# Supplementary material for: FeCl2-catalyzed hydroboration of aryl alkenes with bis(pinacolato)diboron
Source: Royal Society of Chemistry journal article supplement (doi:10.1039/c5ra14869c), 2015-01-01

Supporting Information for:

**FeCl<sub>2</sub> Catalyzed Hydroboration of Aryl Alkenes with Bis(pinacolato)diboron**

**Yang Liu, Yuhan Zhou,\* Huan Wang and Jingping Qu**

*State Key Laboratory of Fine Chemicals, School of Pharmaceutical Science and Technology,  
Dalian University of Technology, Dalian 116024, P.R. China*

**Contents**

NMR spectra of the products

SI-2

# NMR Spectra

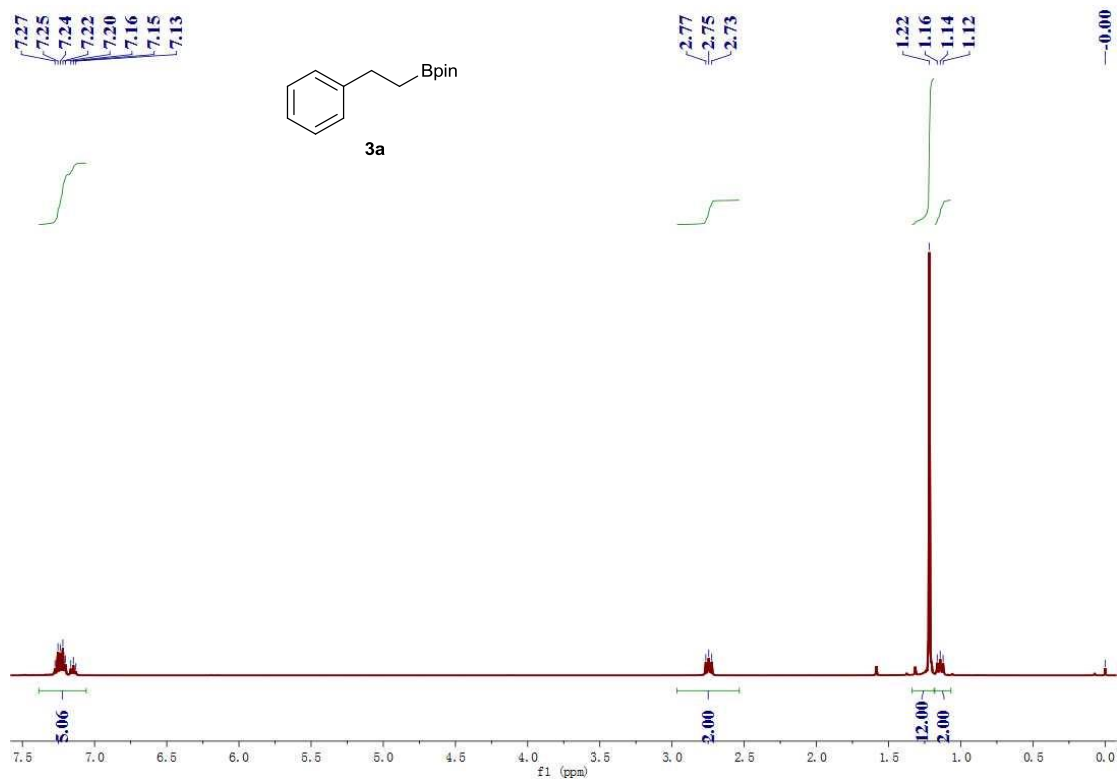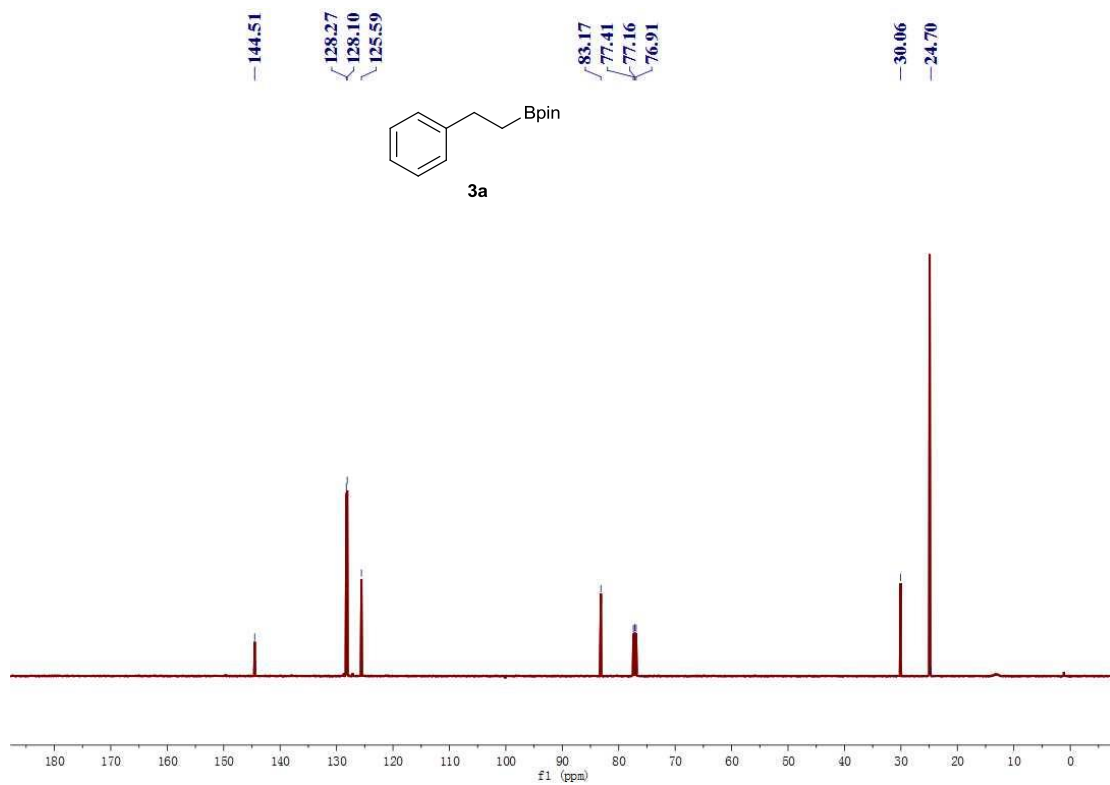

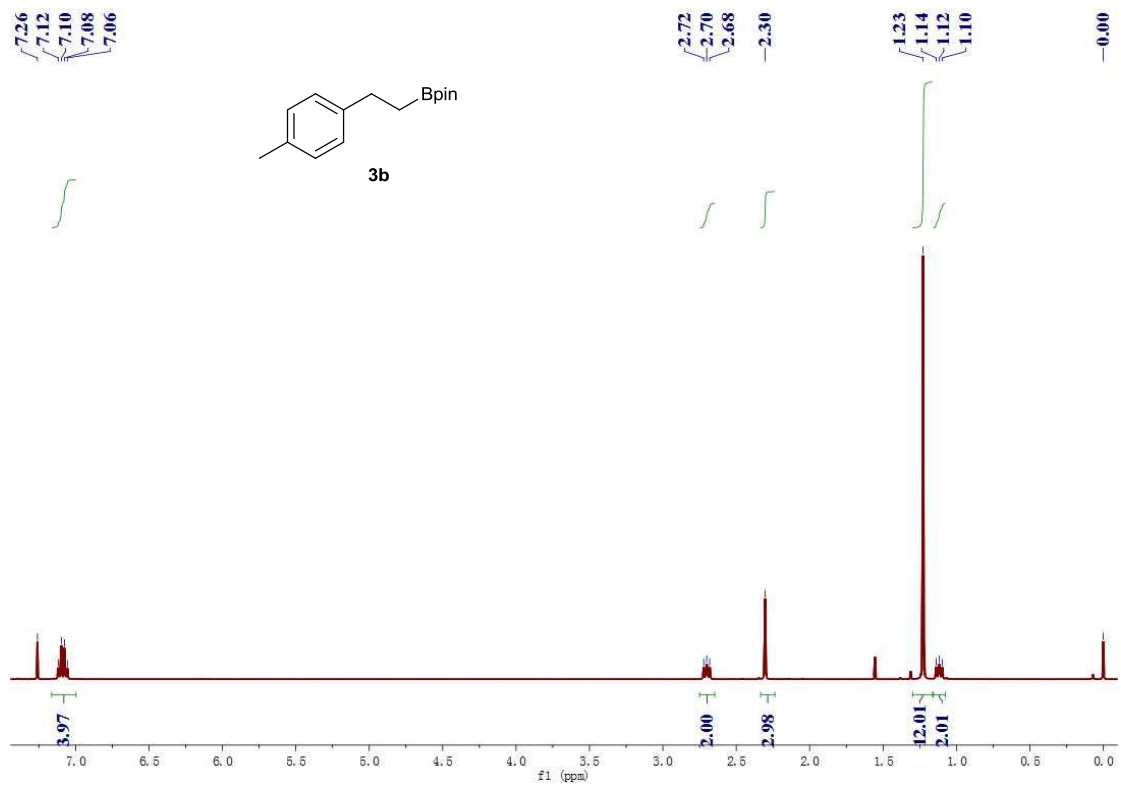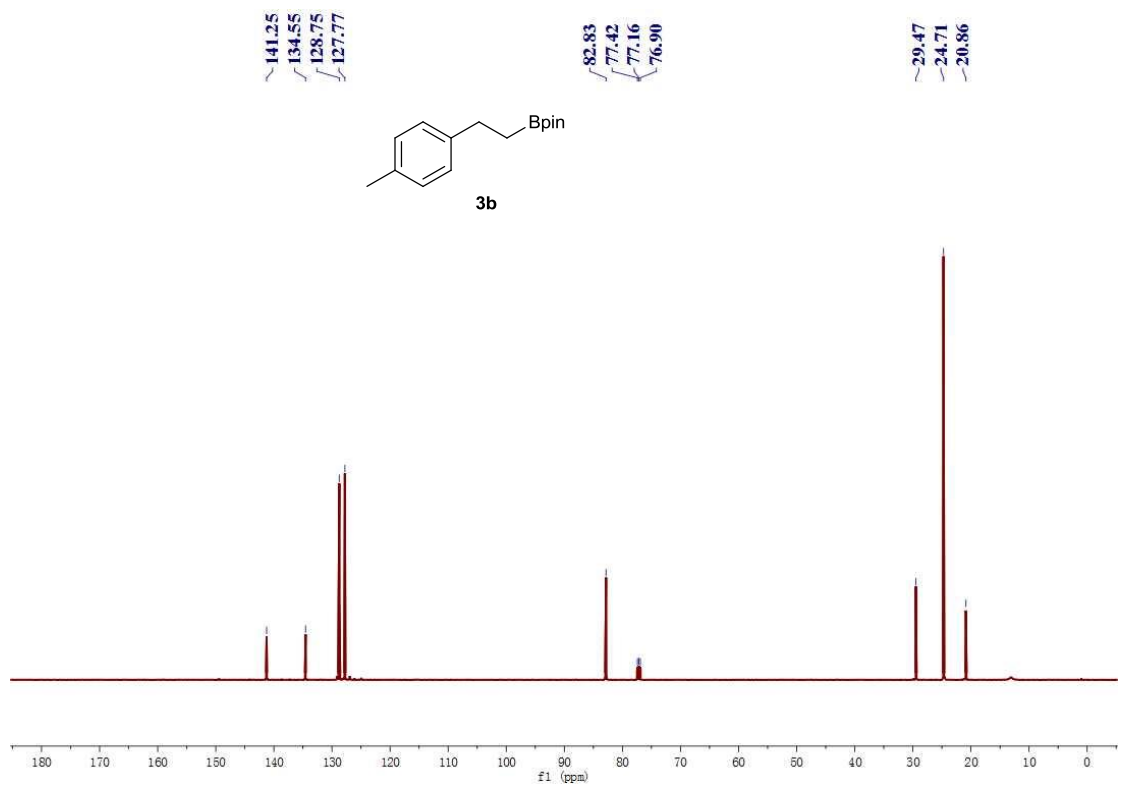

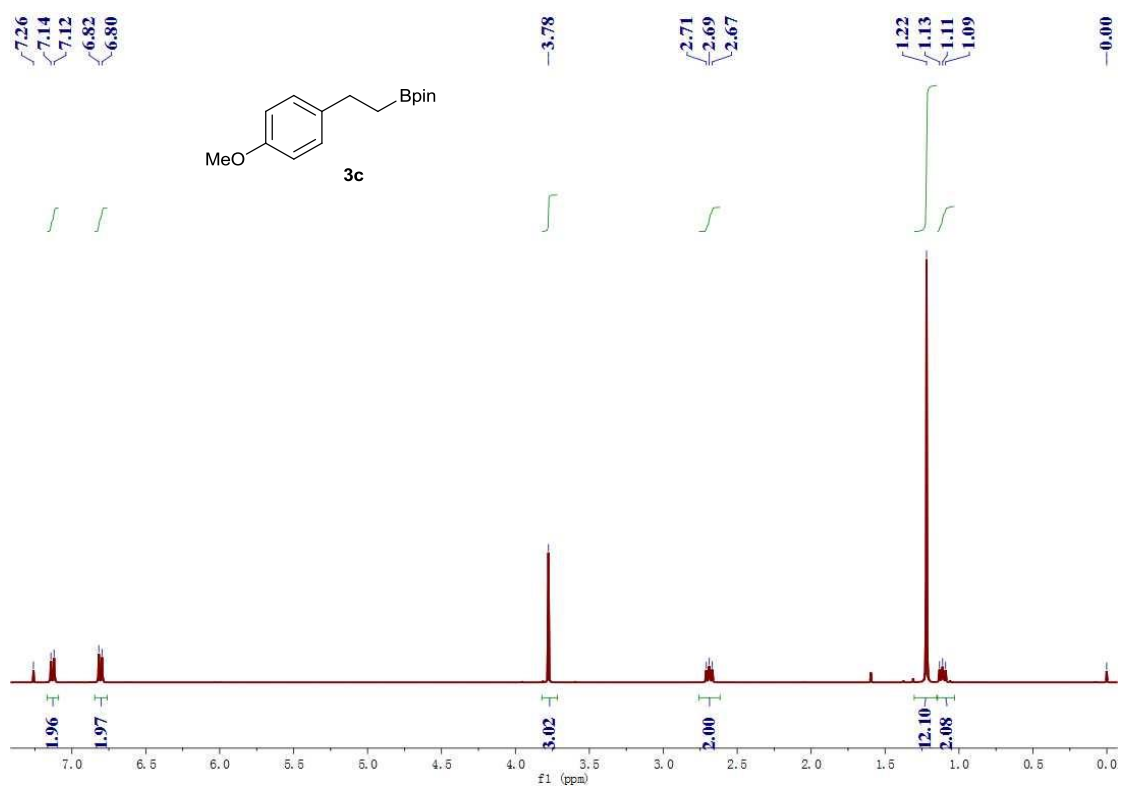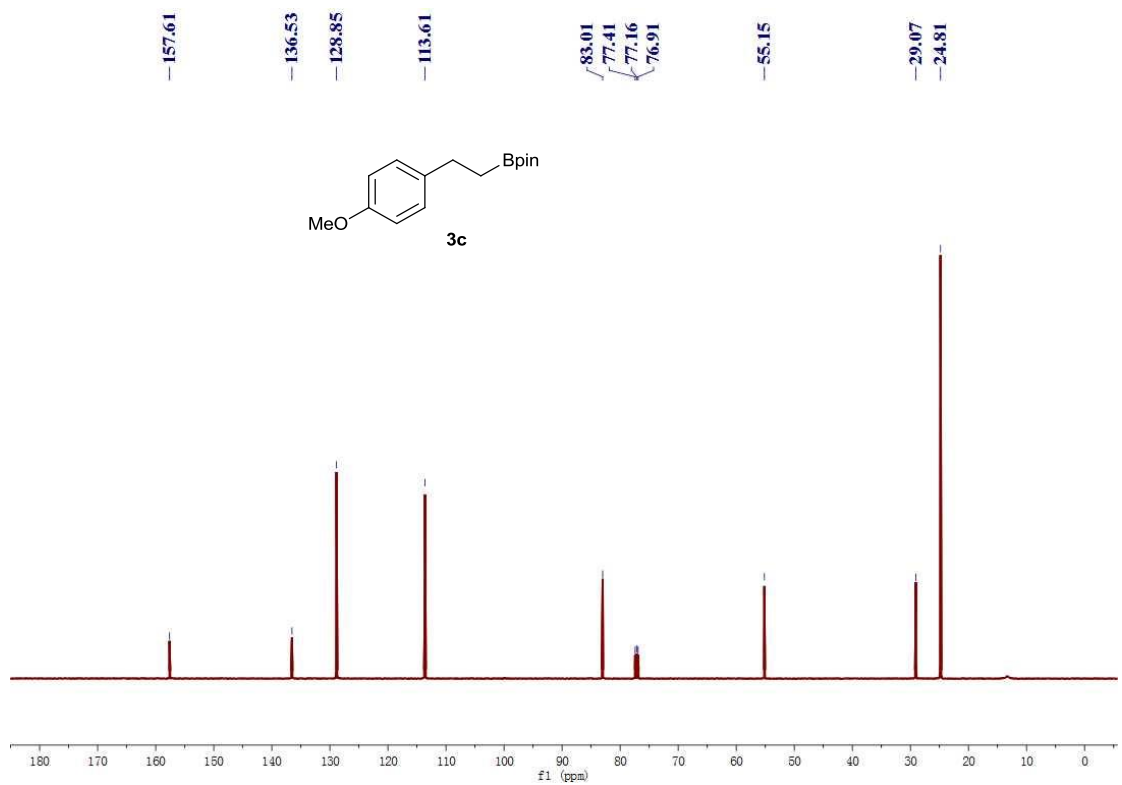

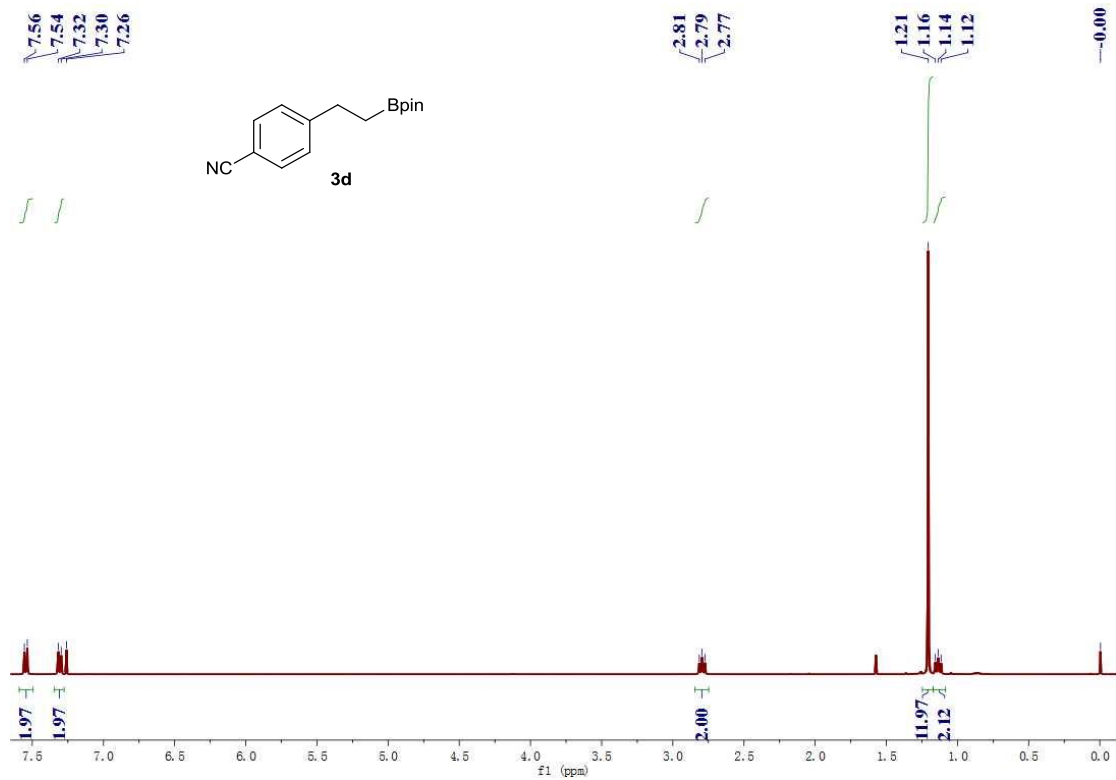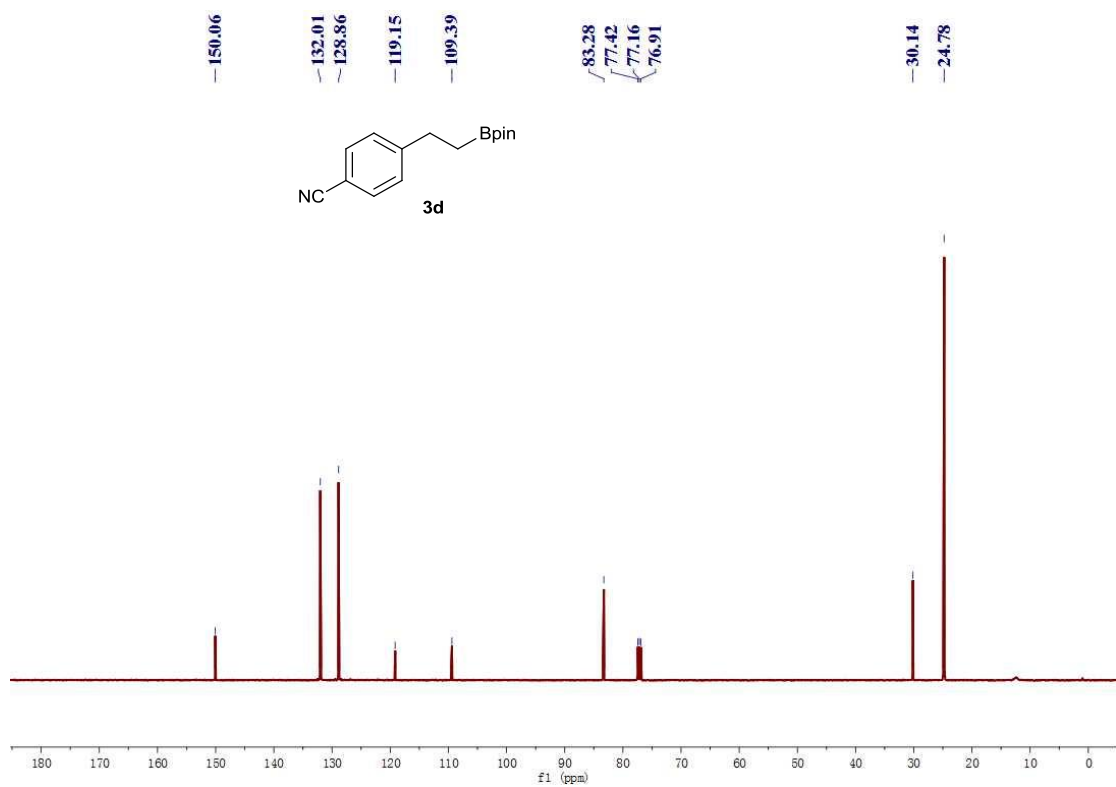

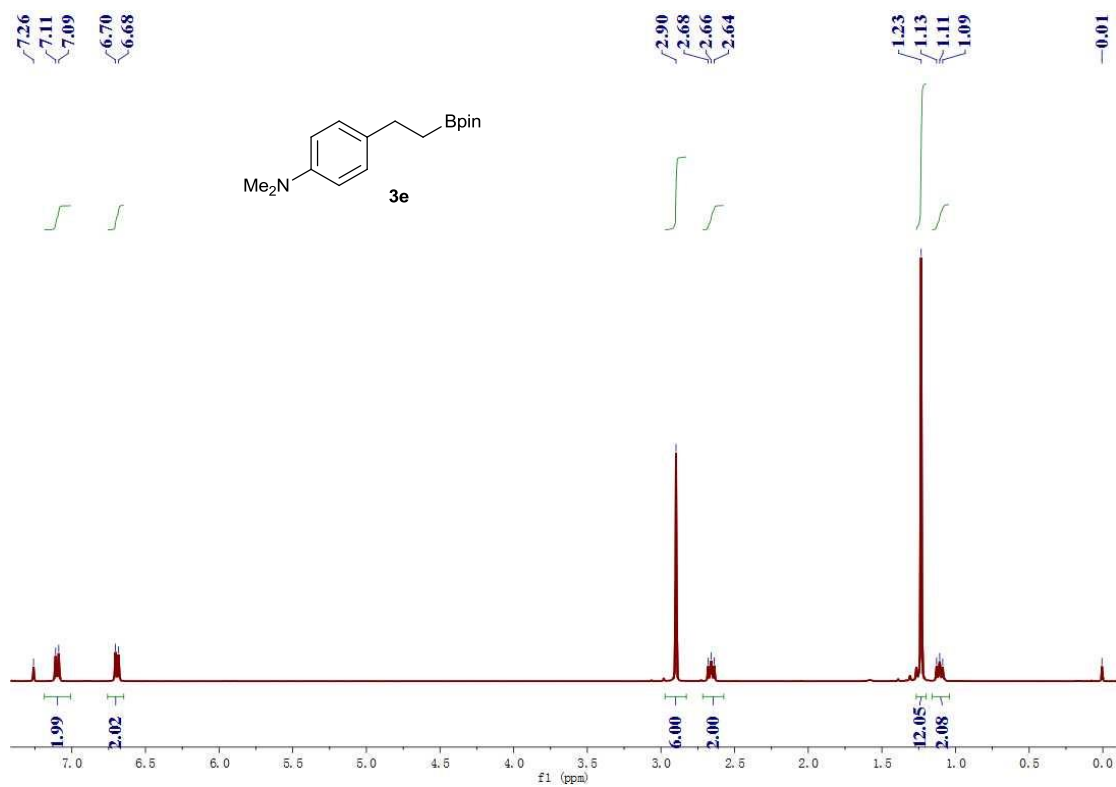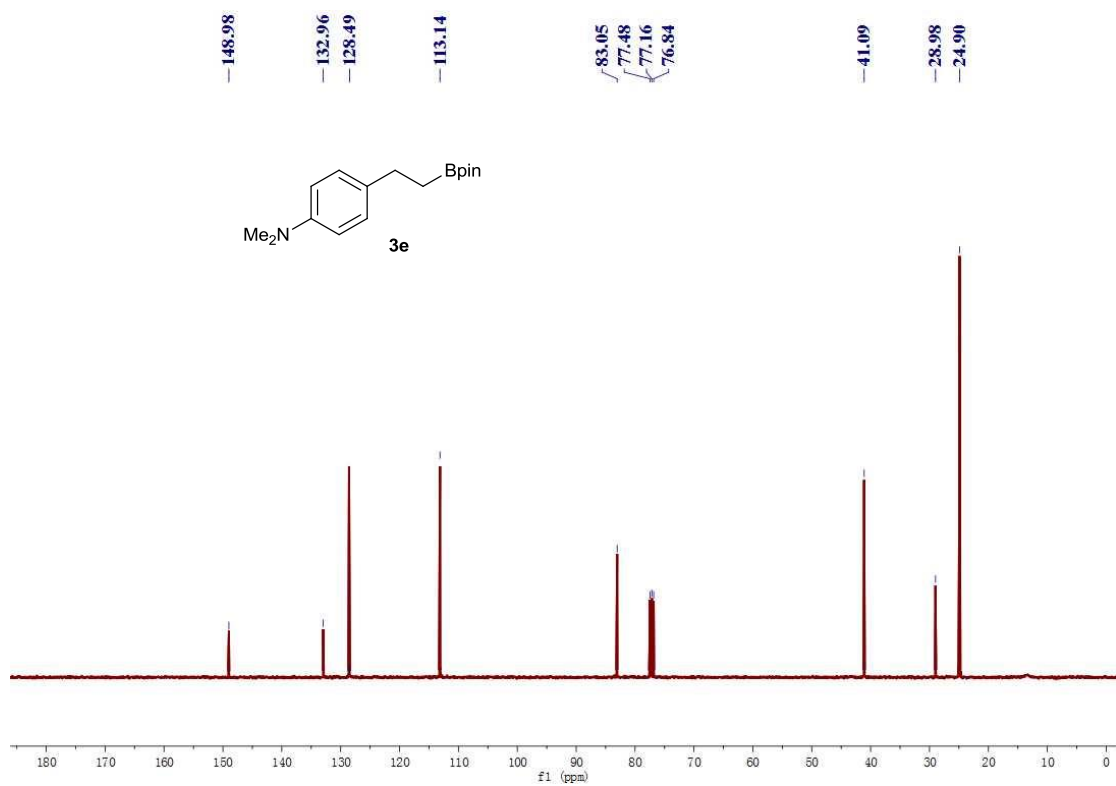

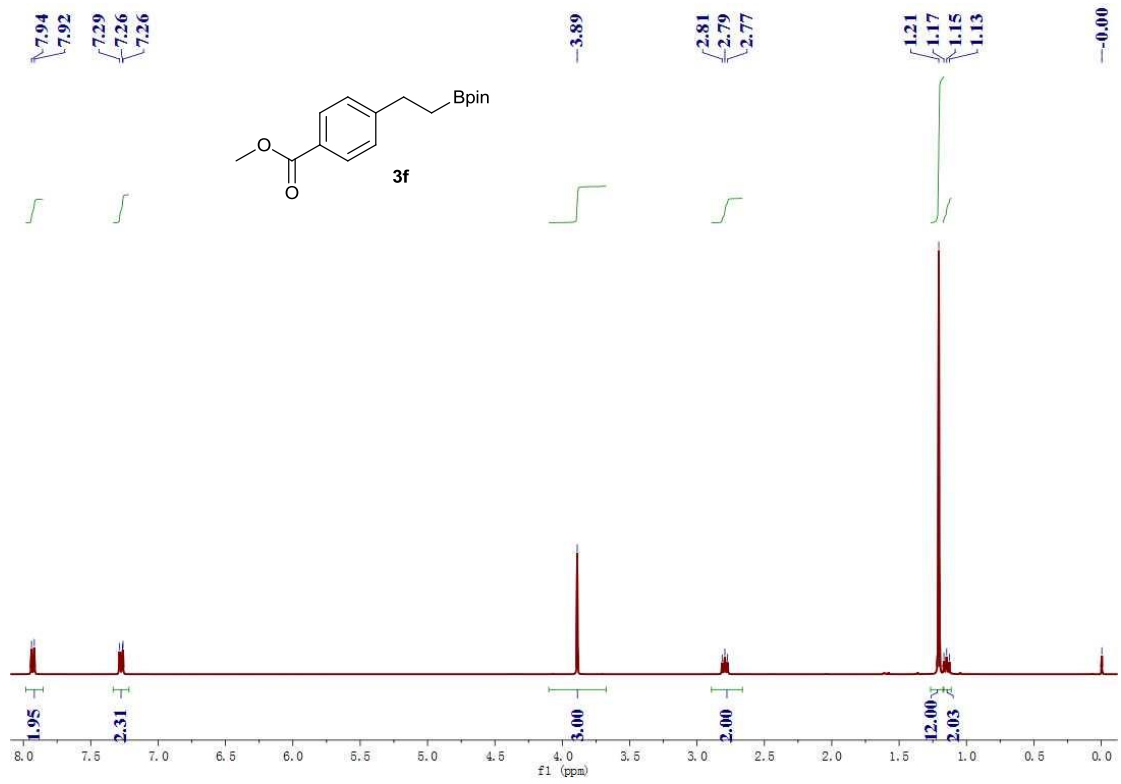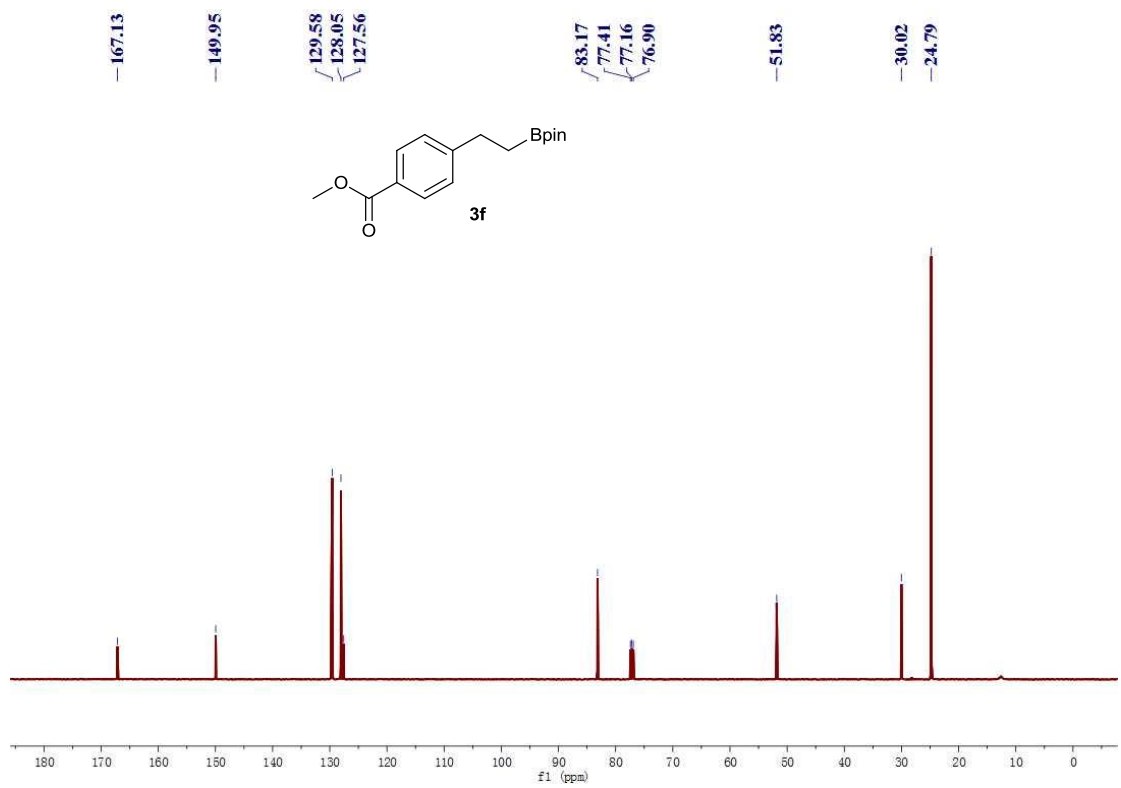

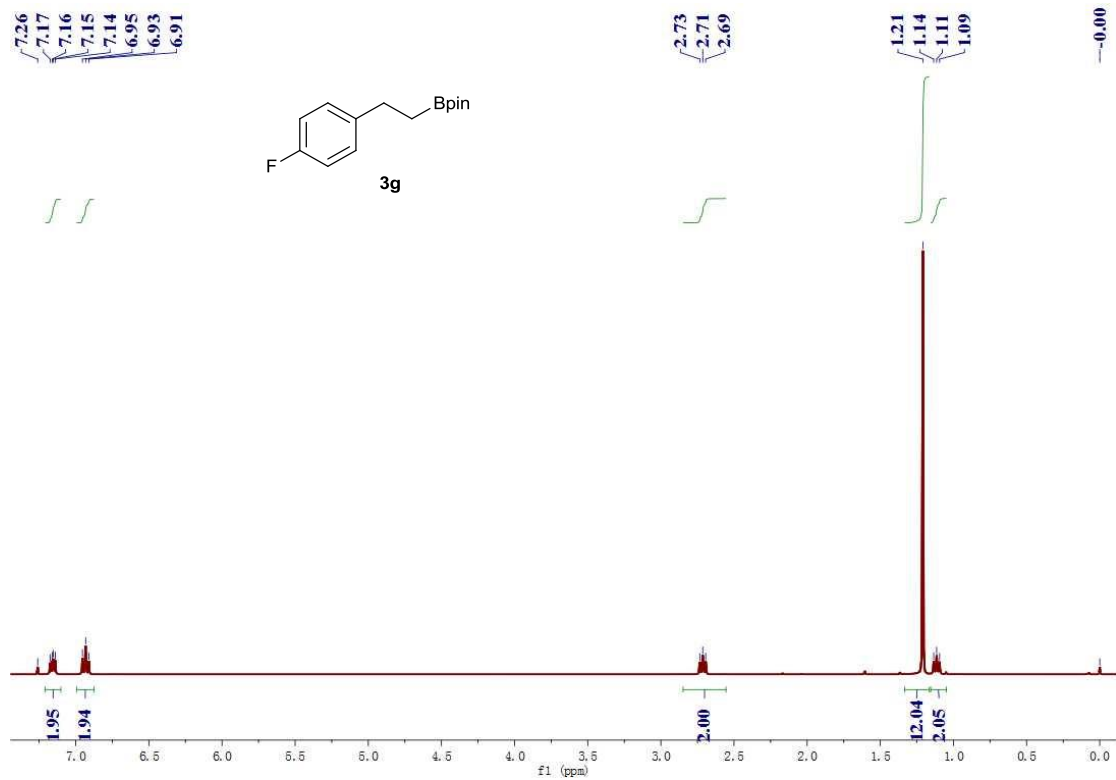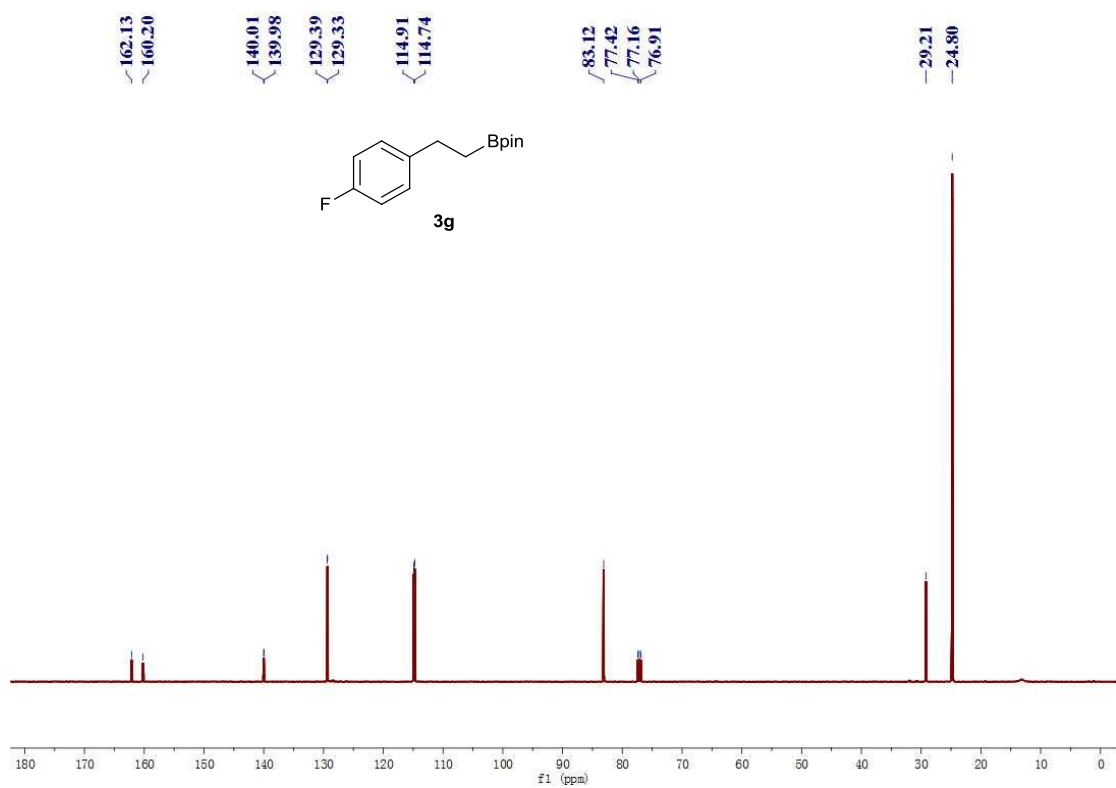



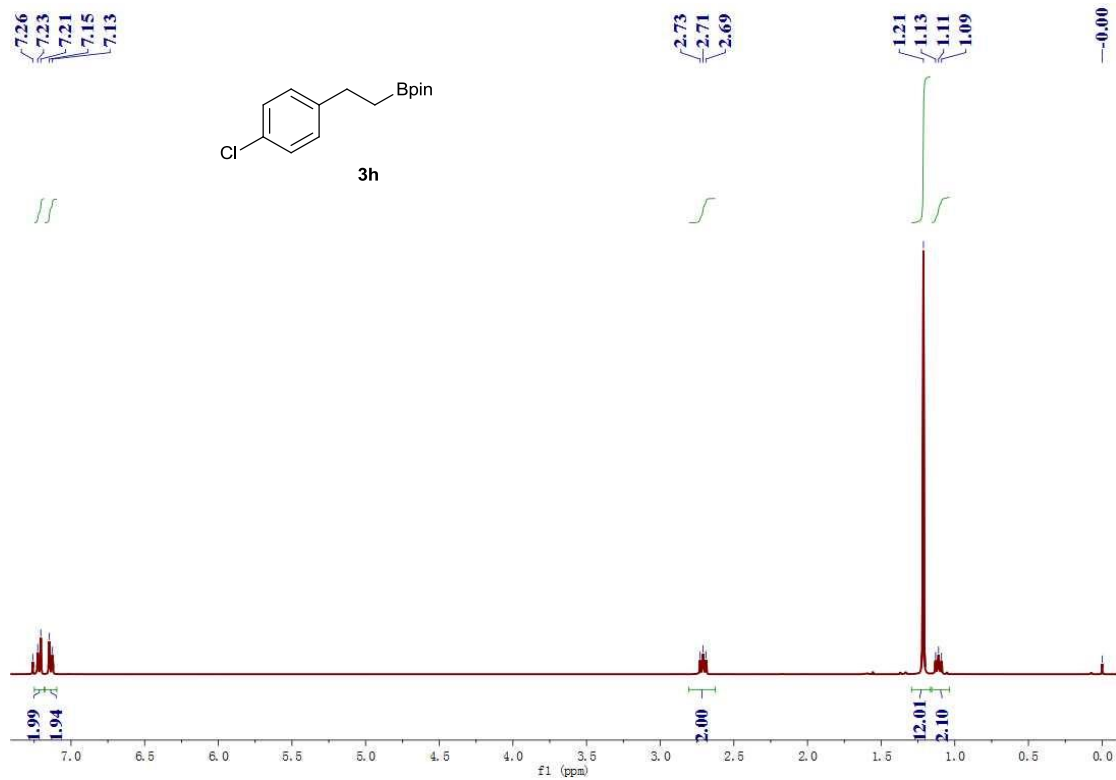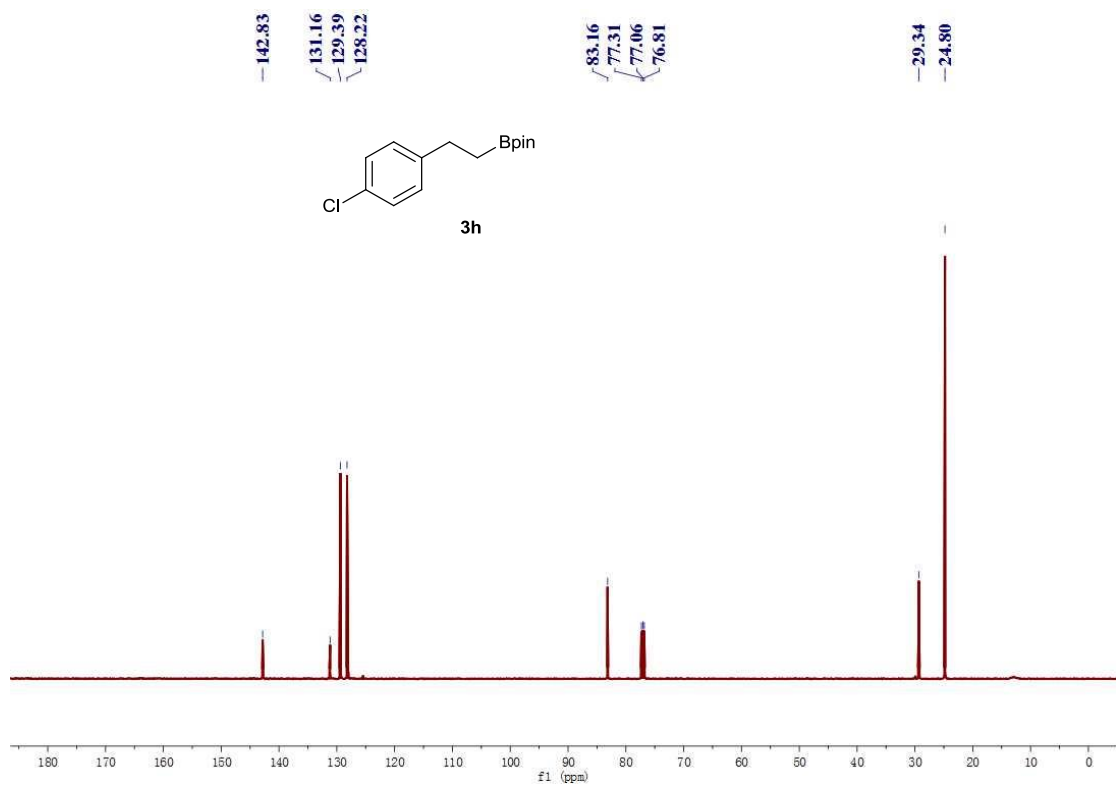

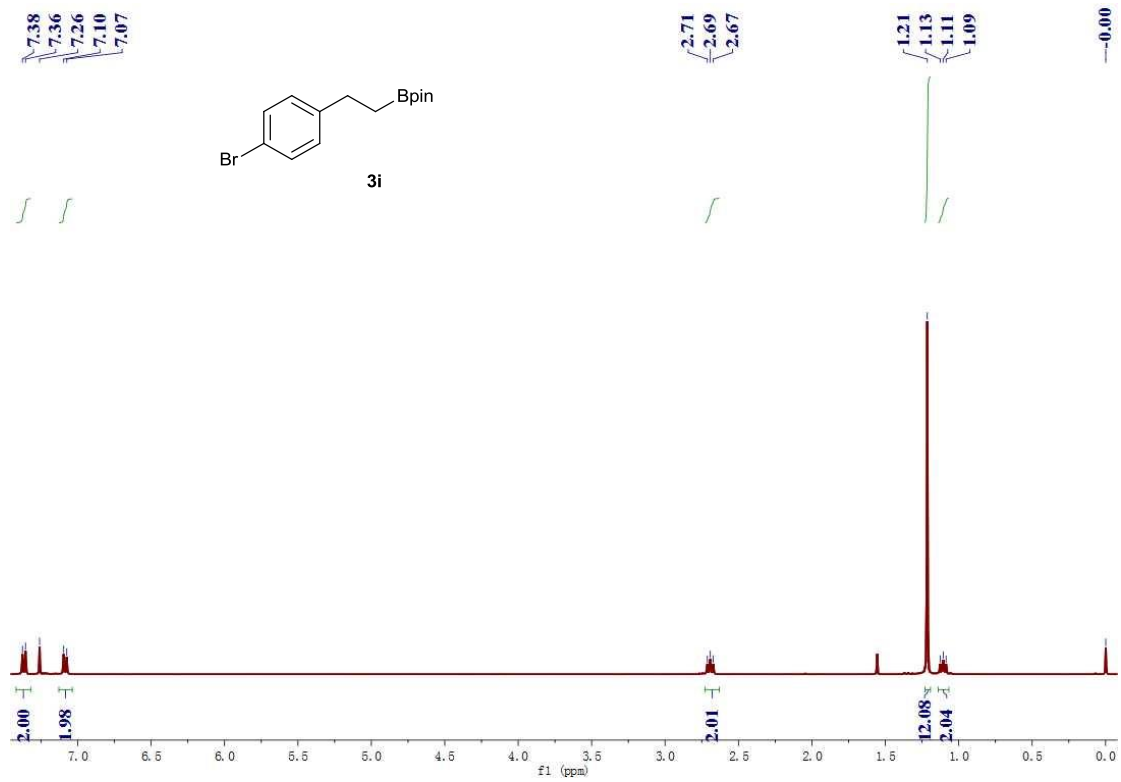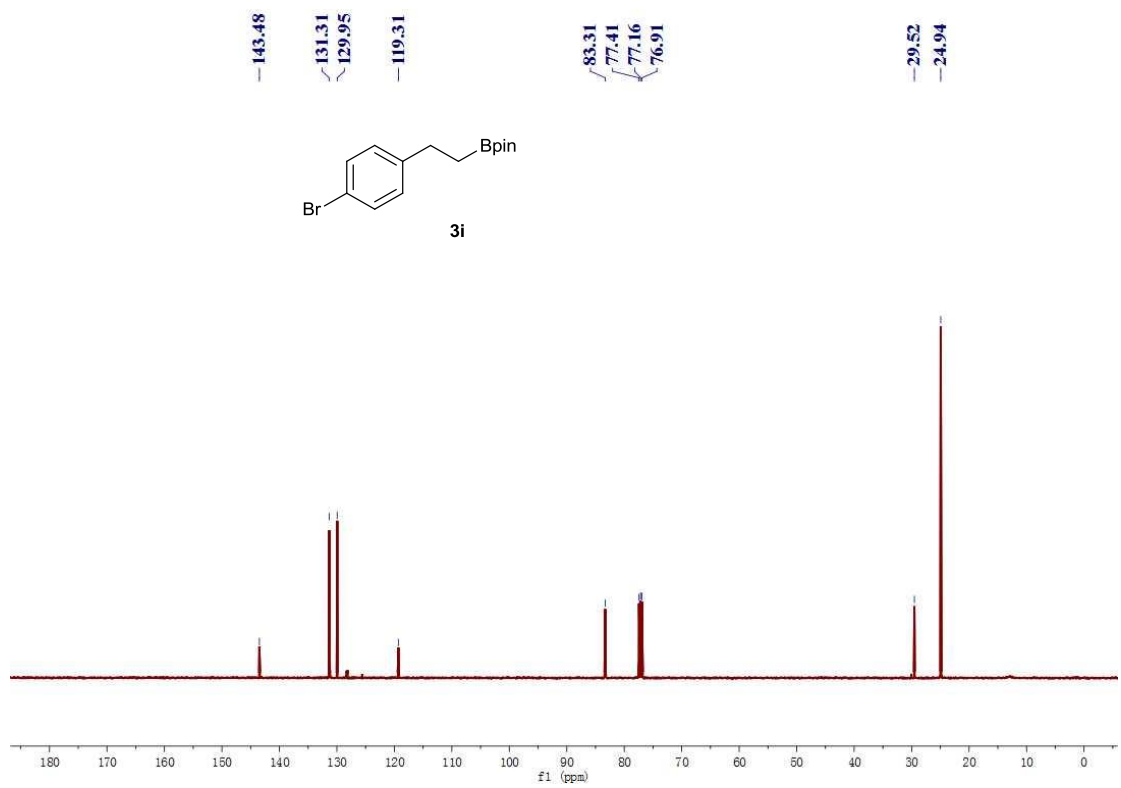

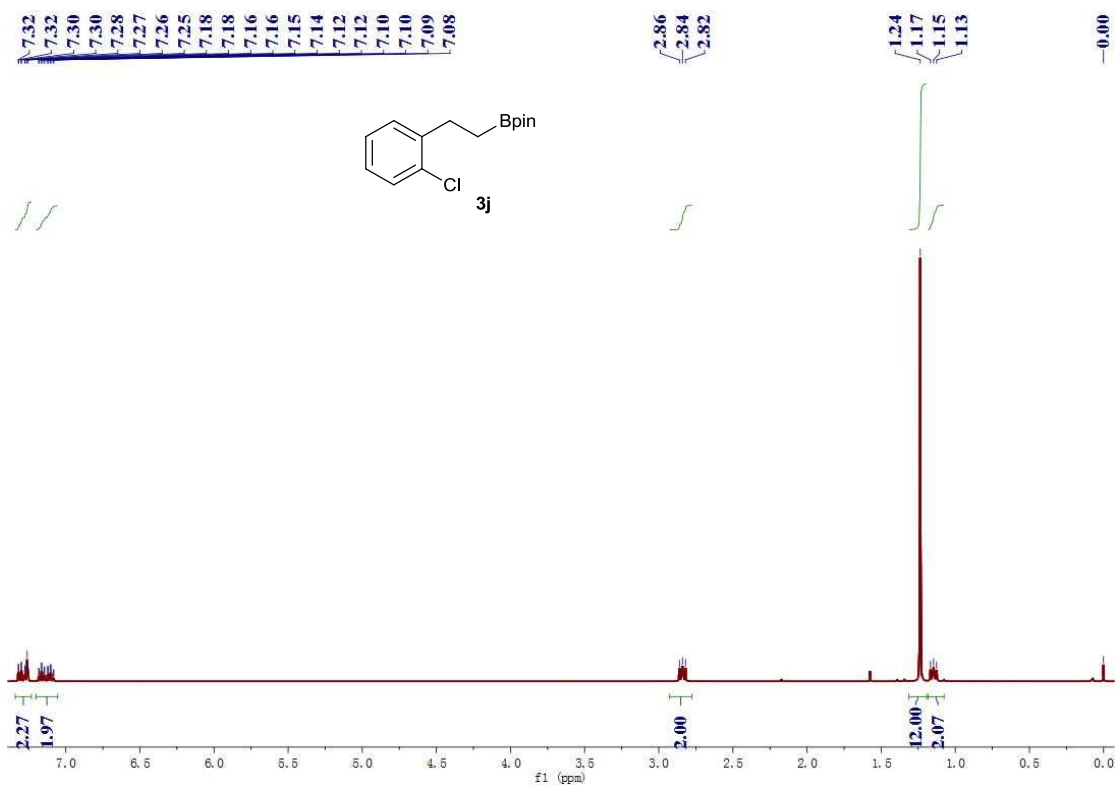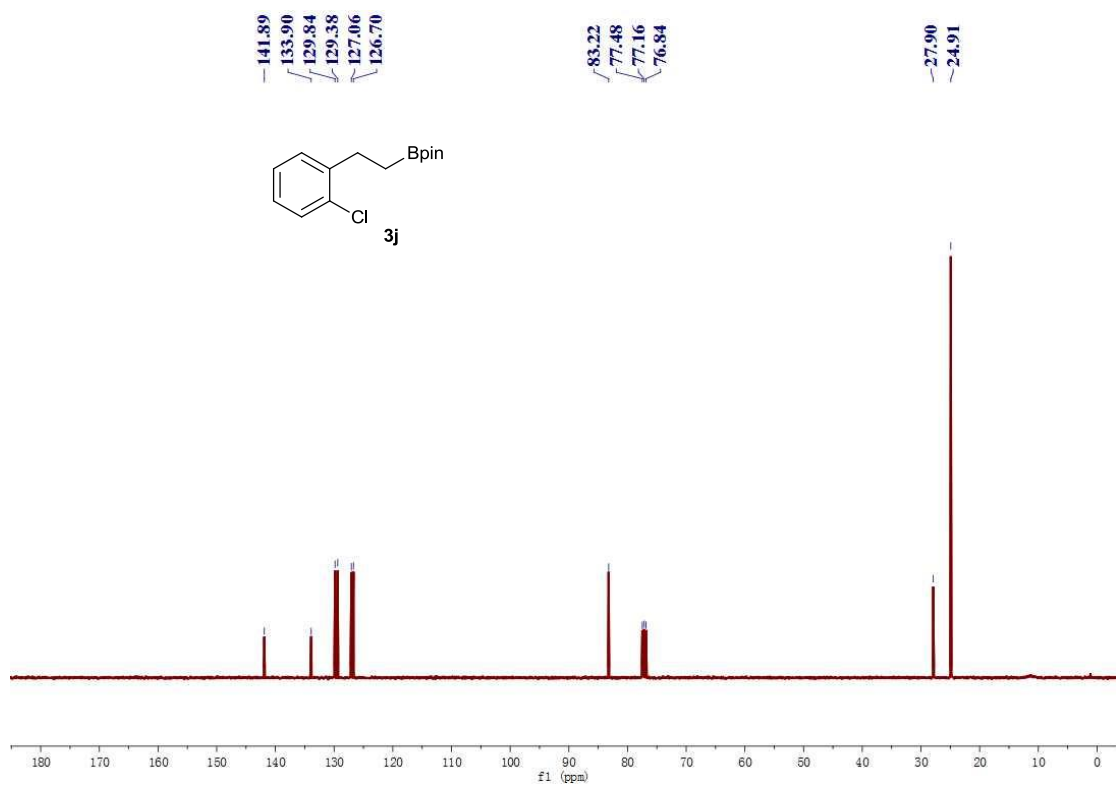

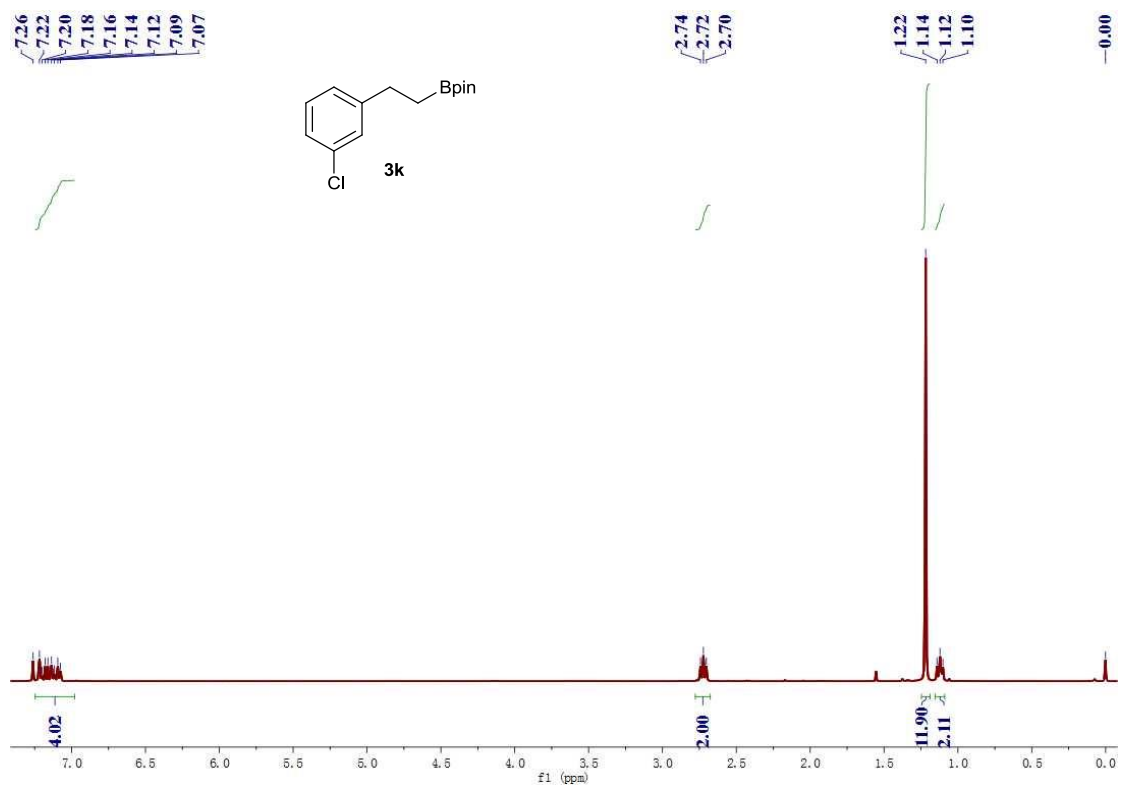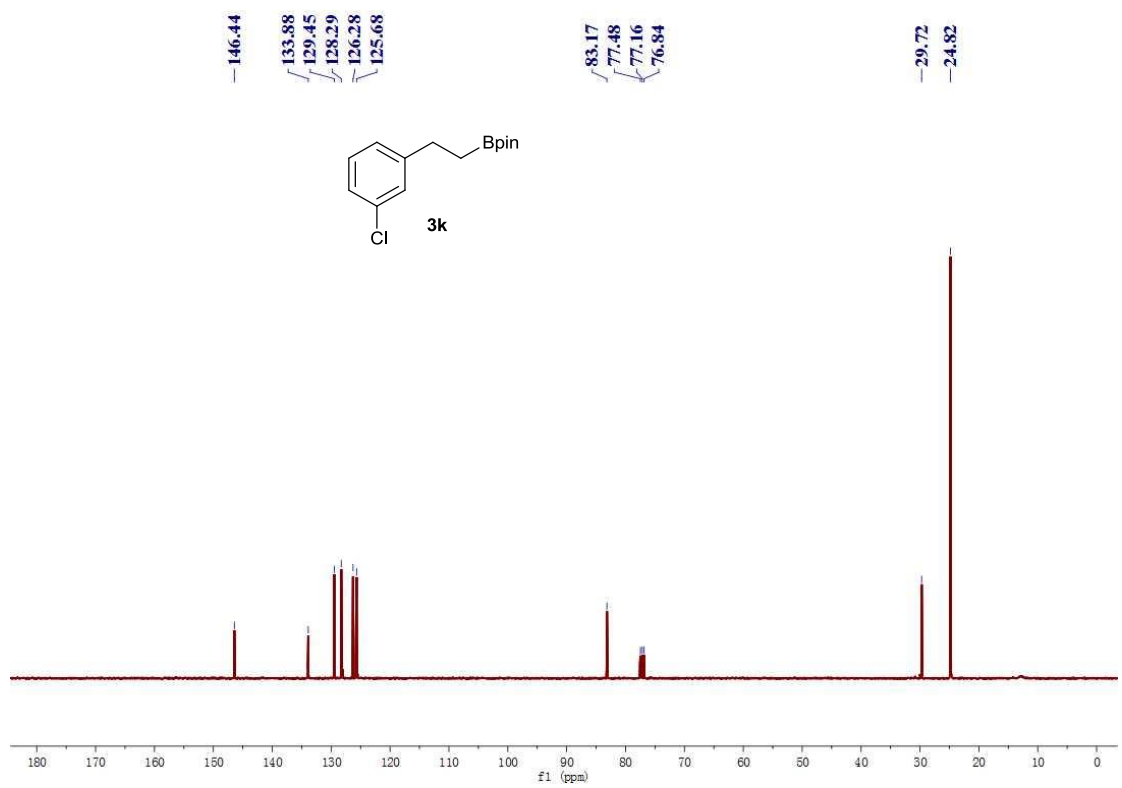

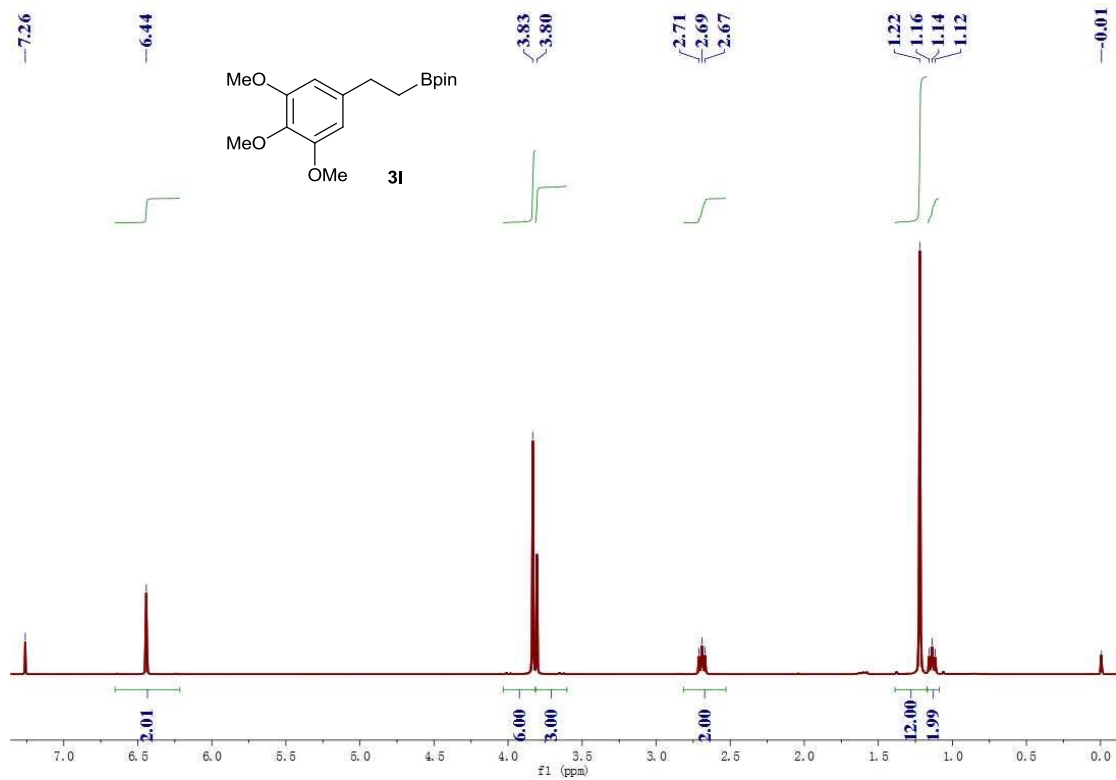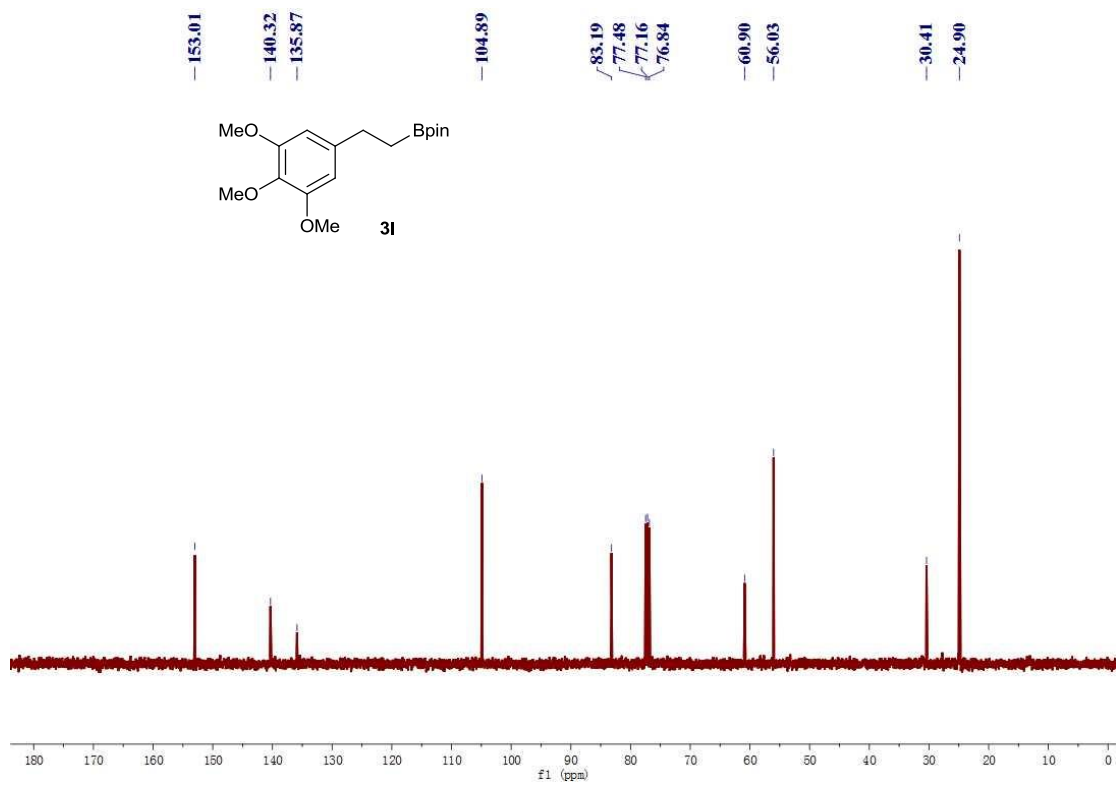

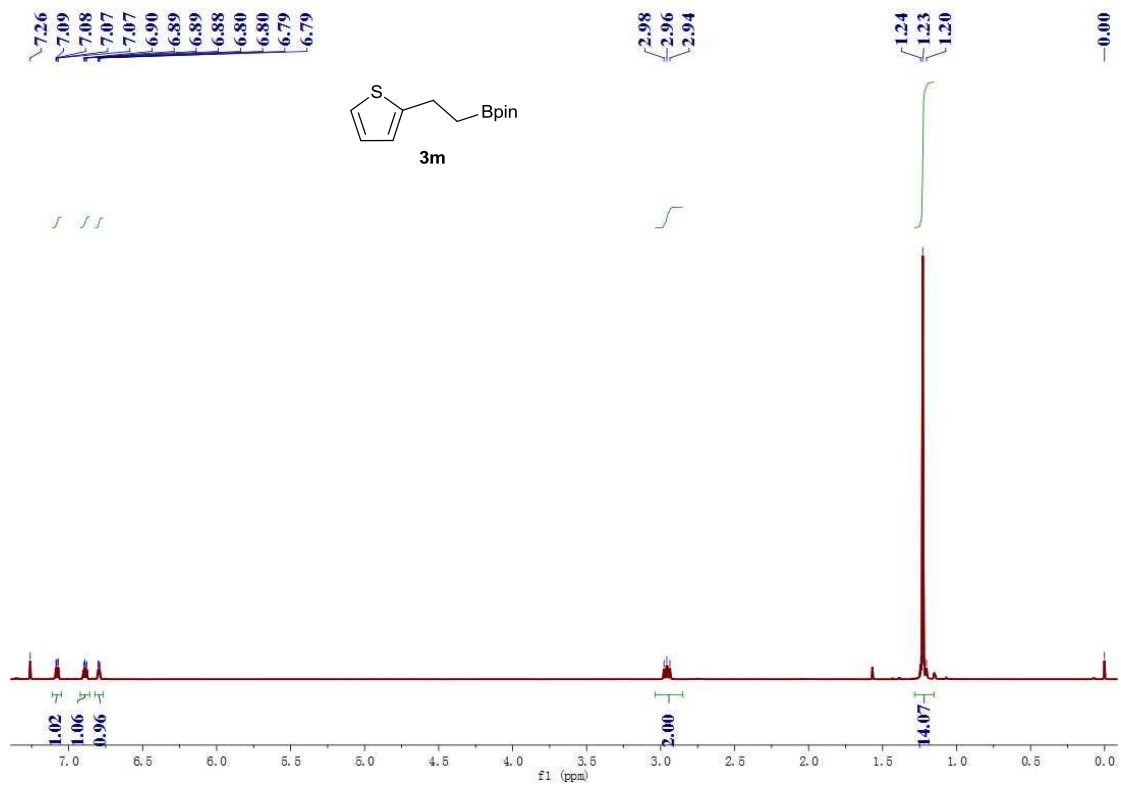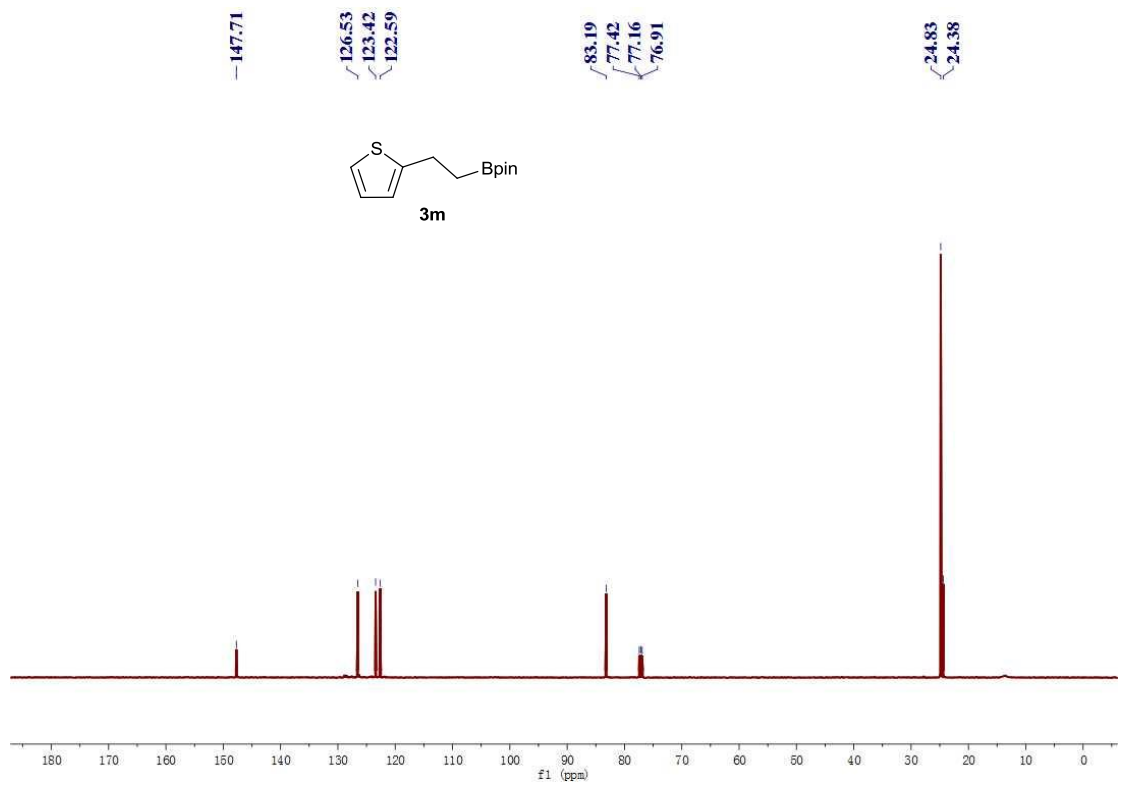

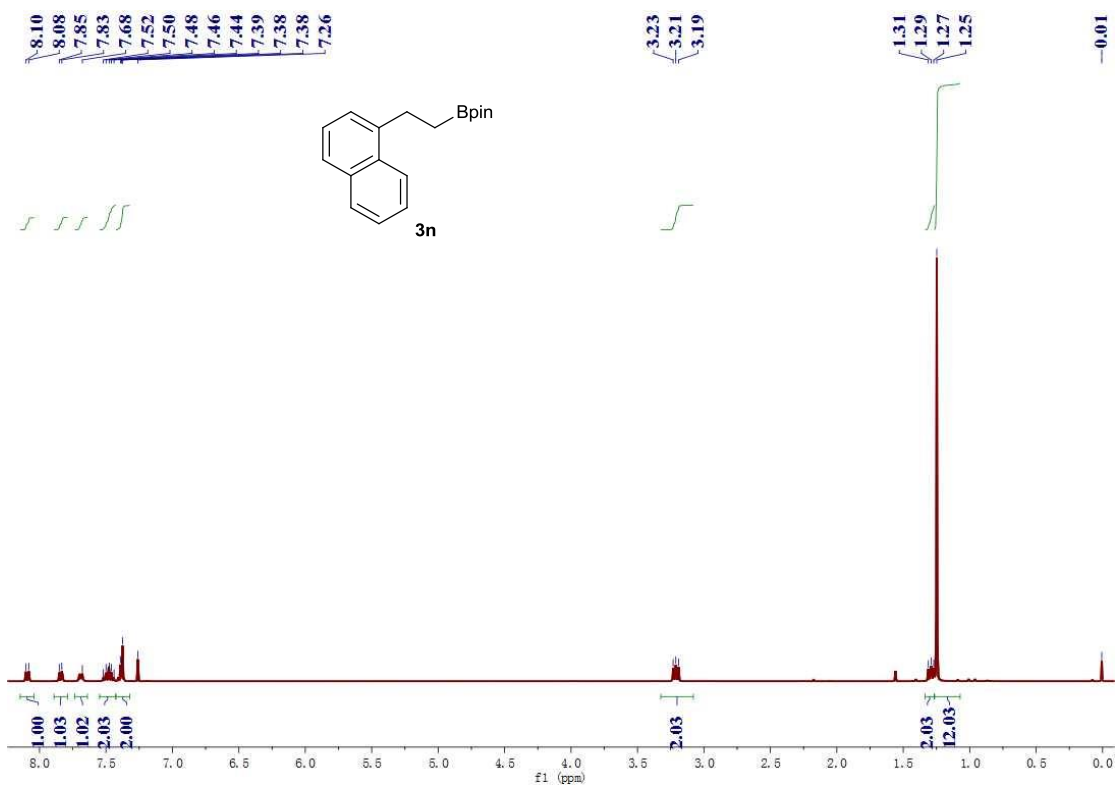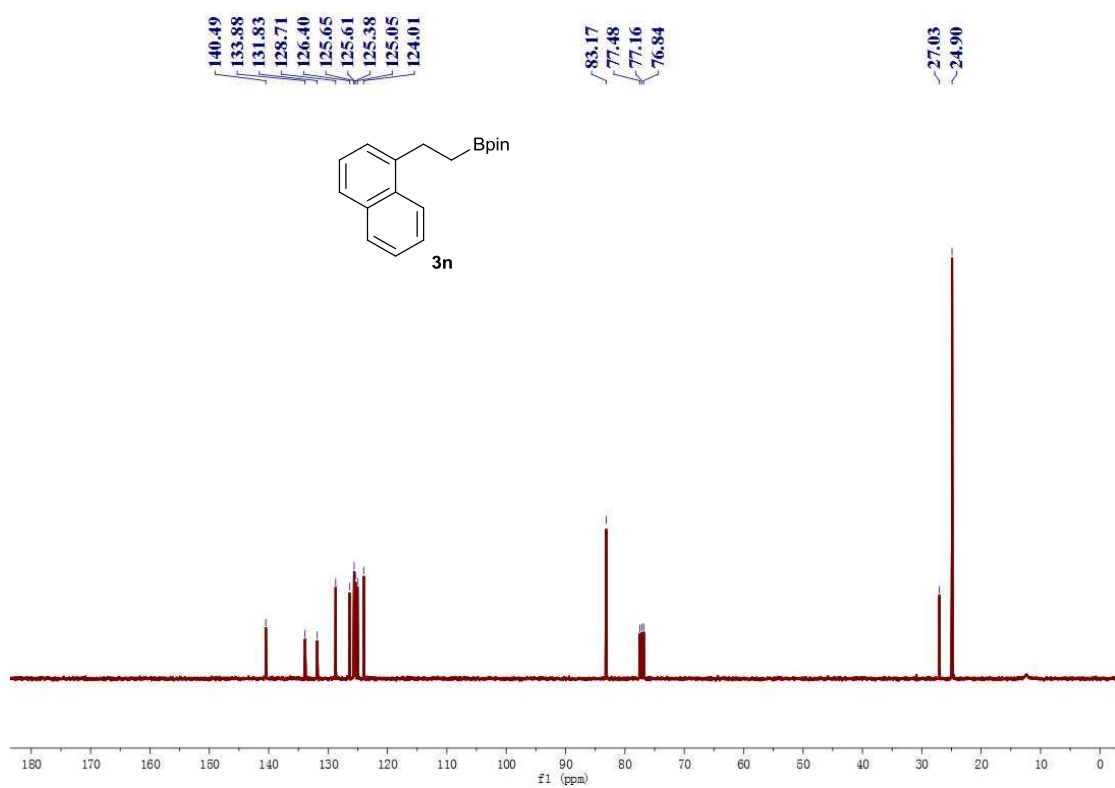

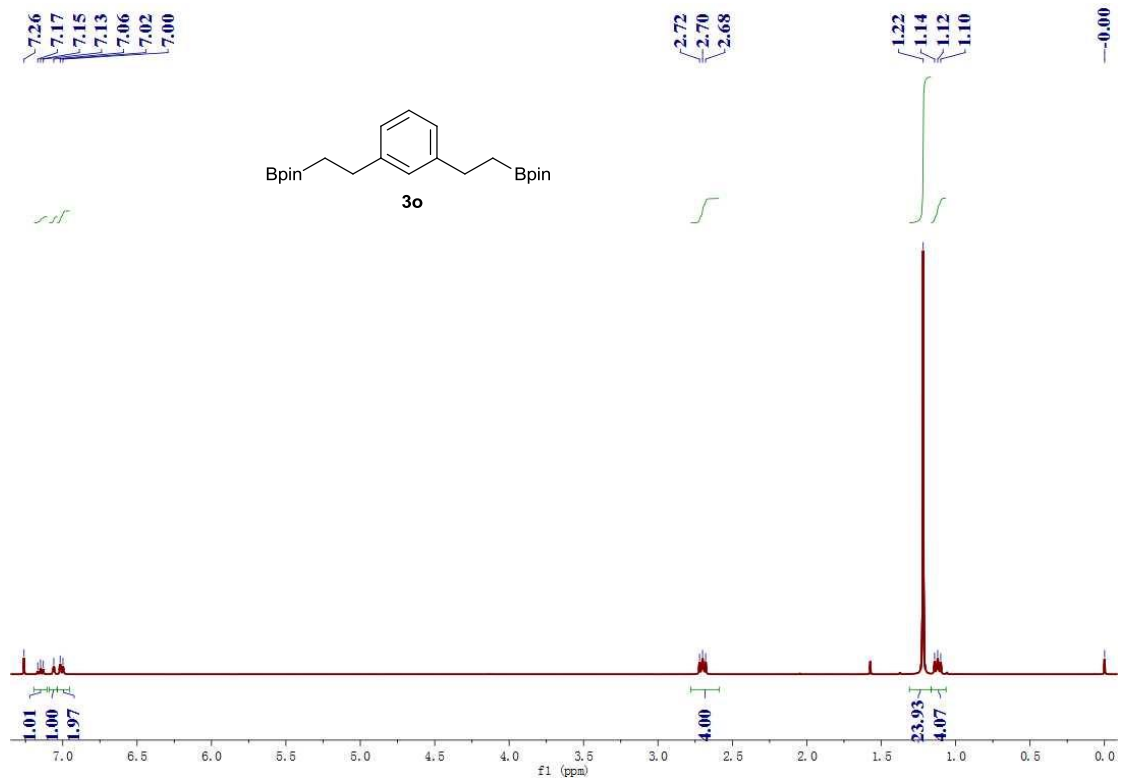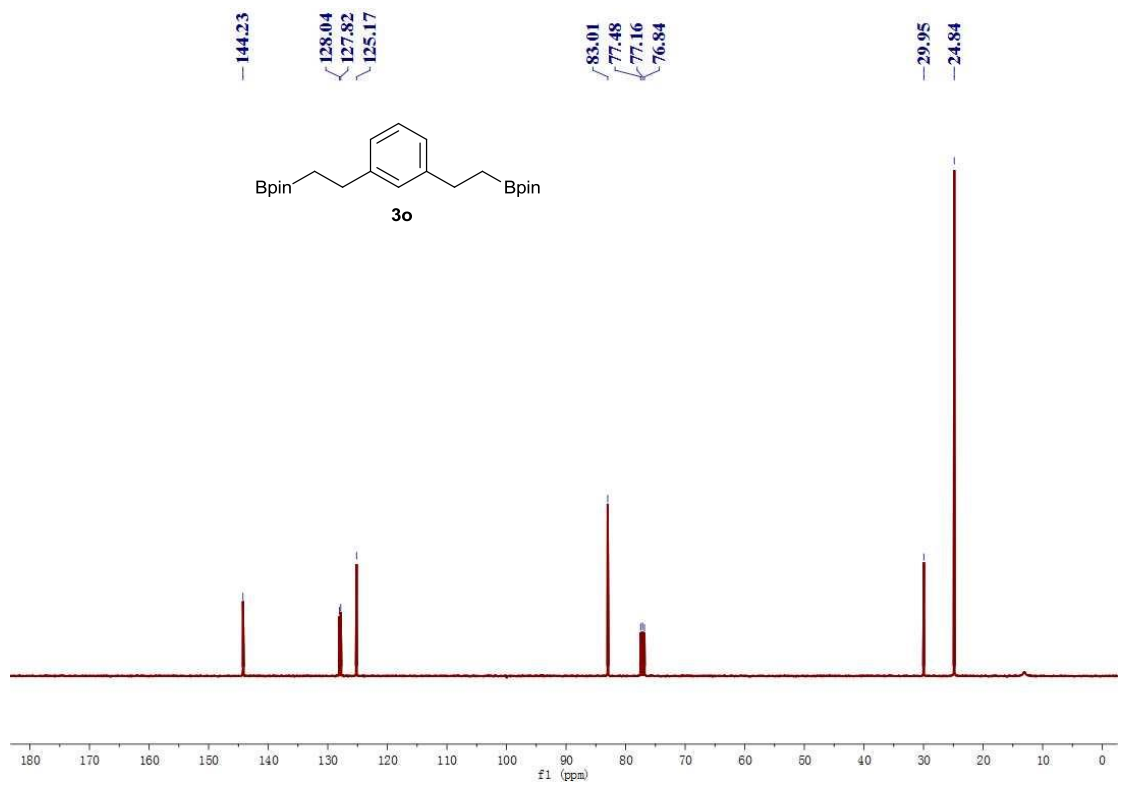



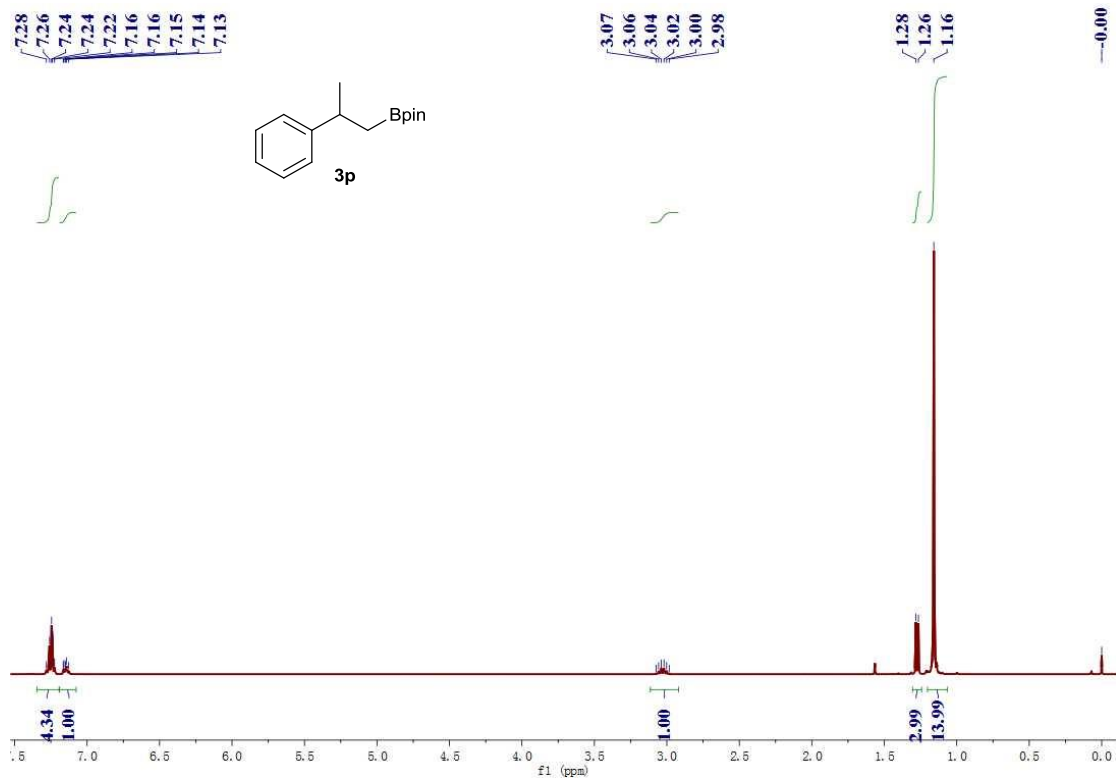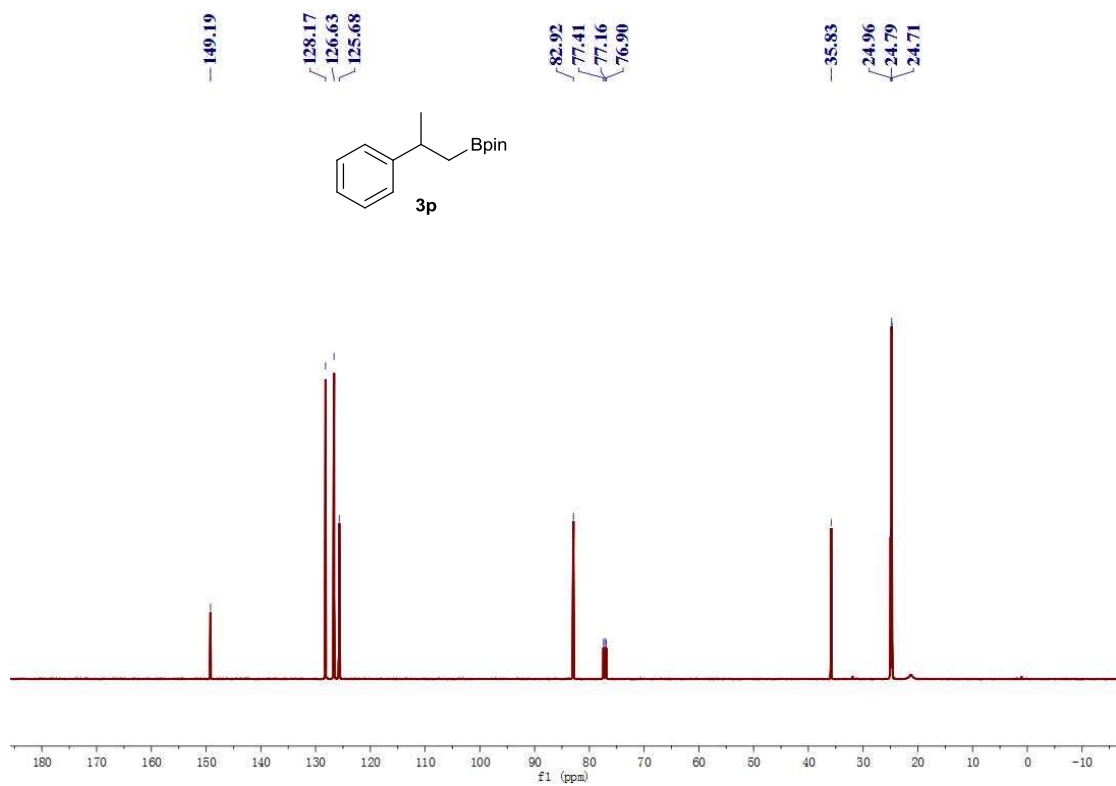

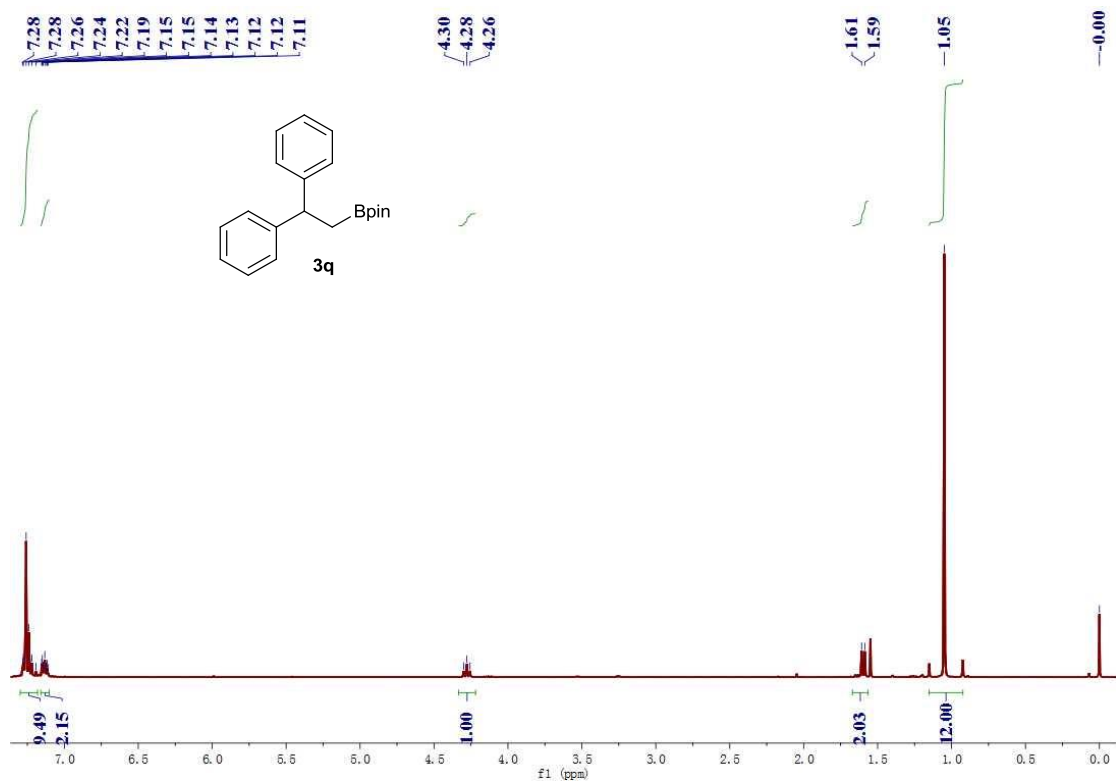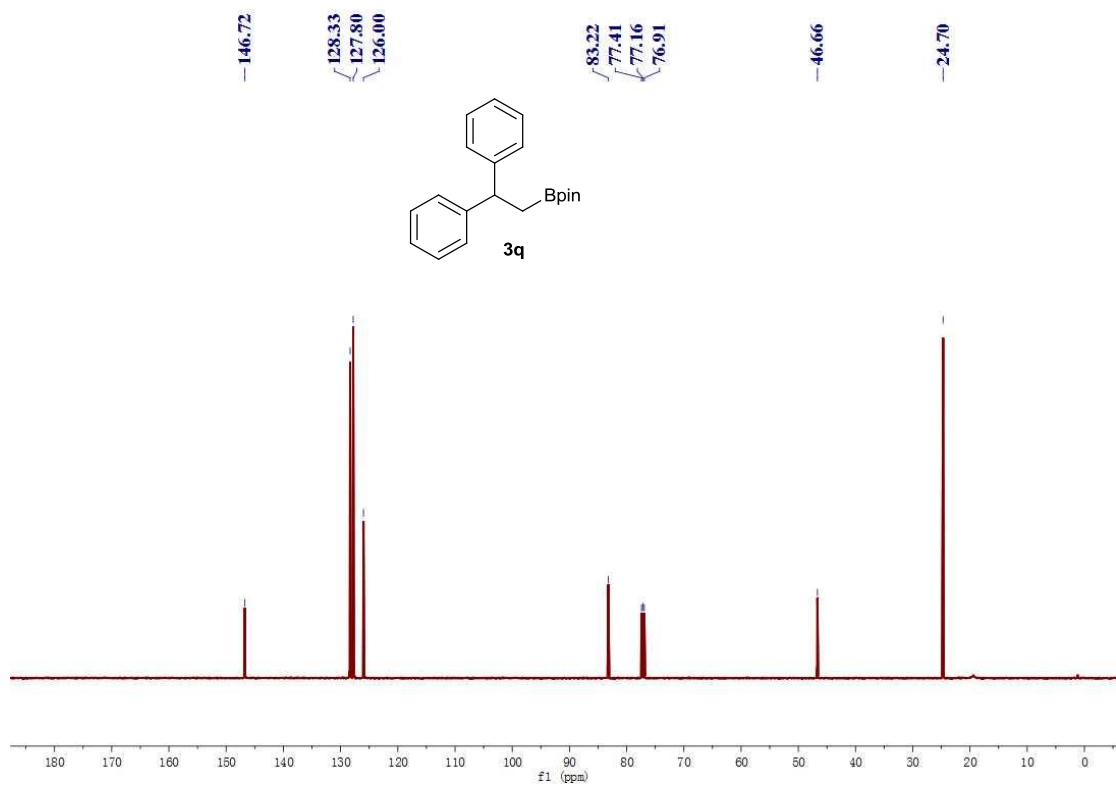

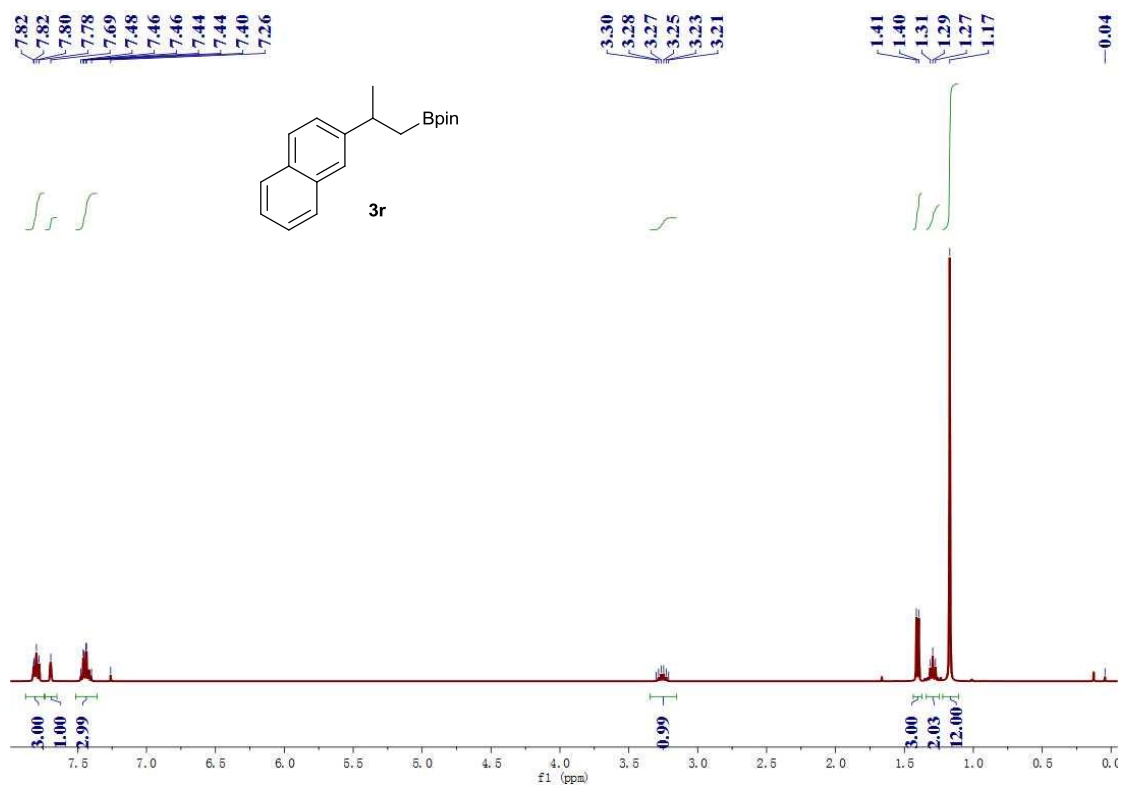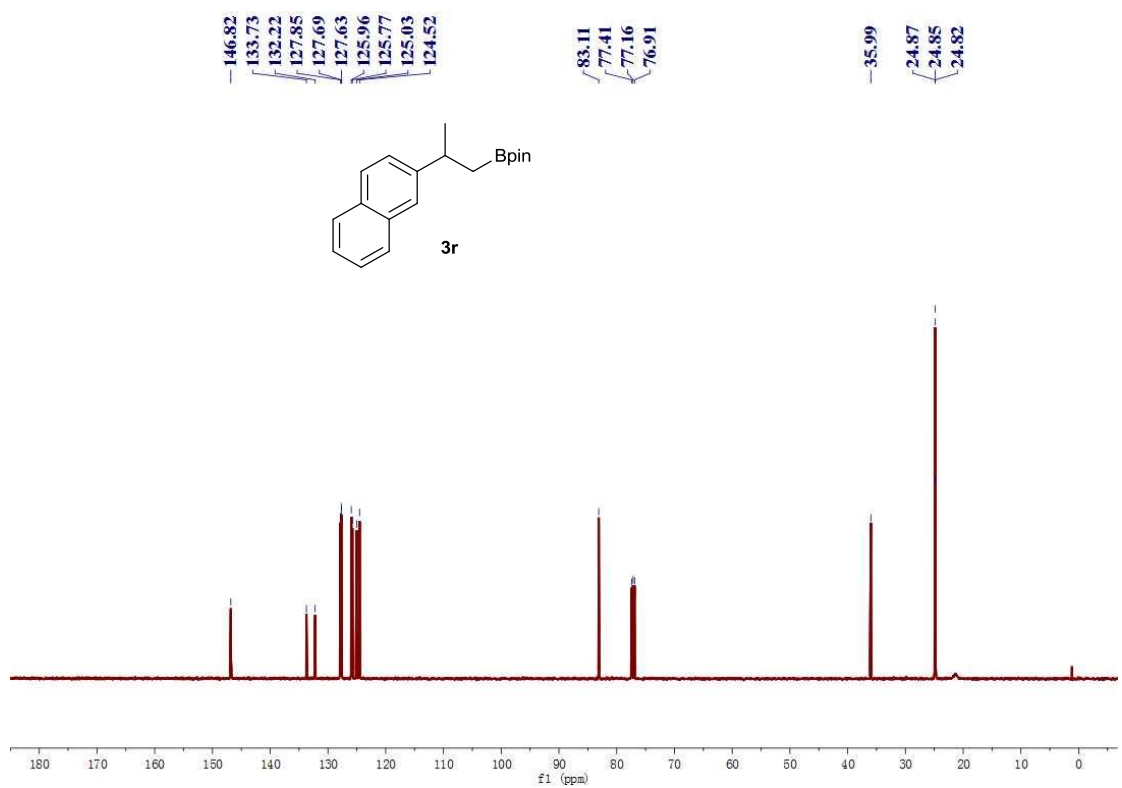

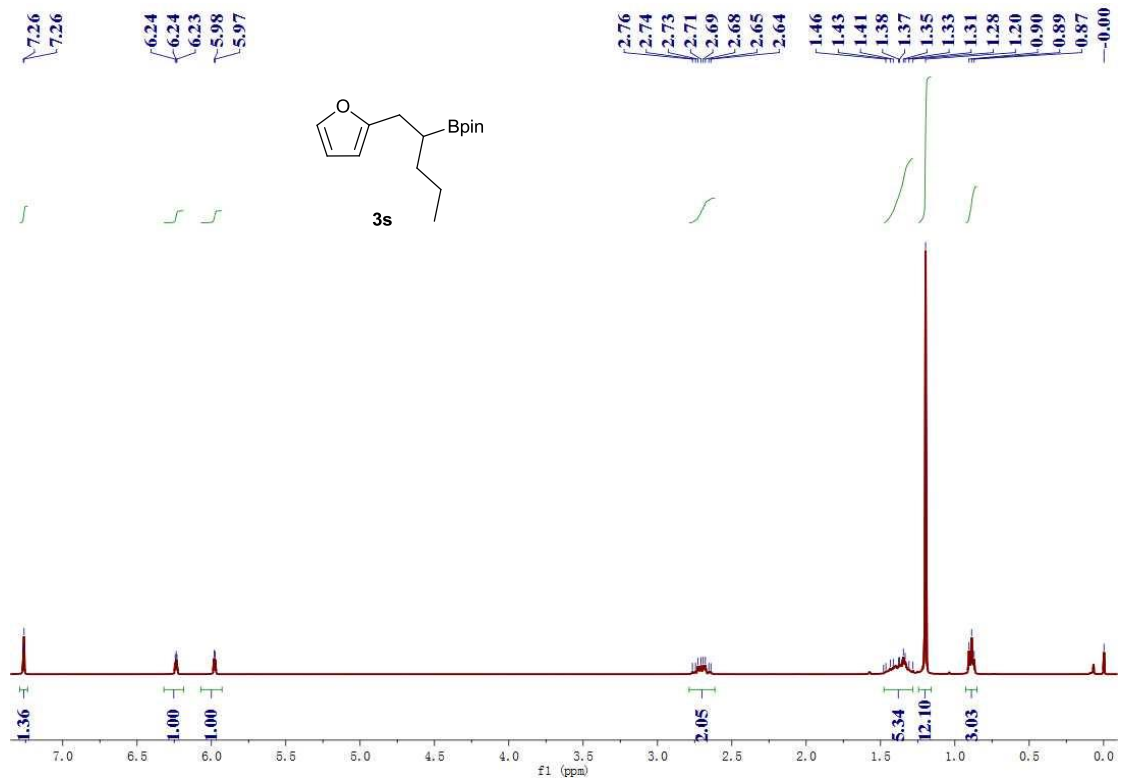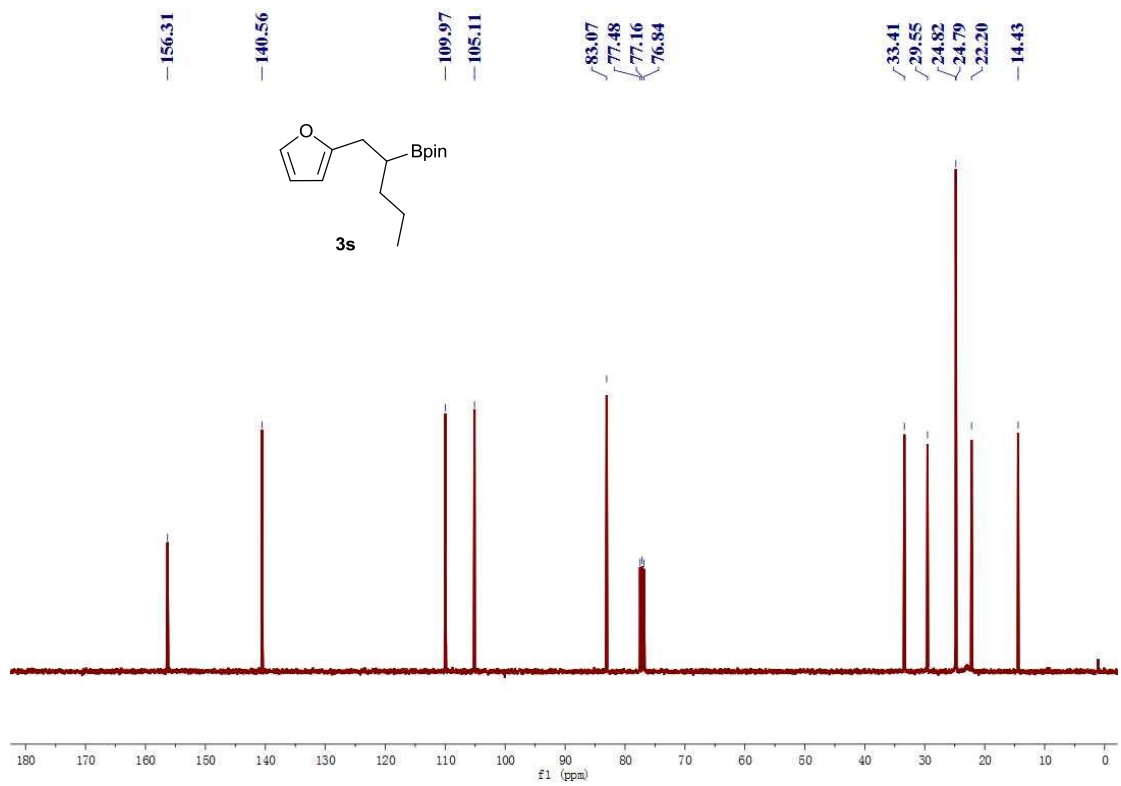

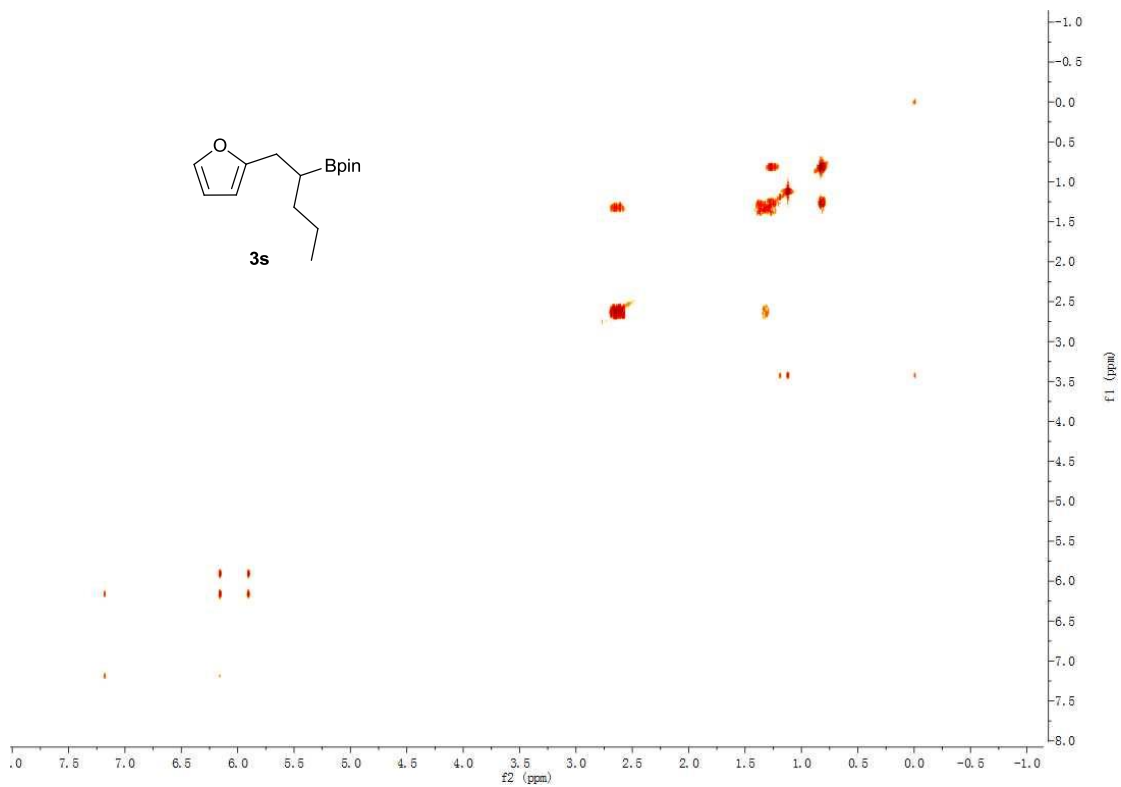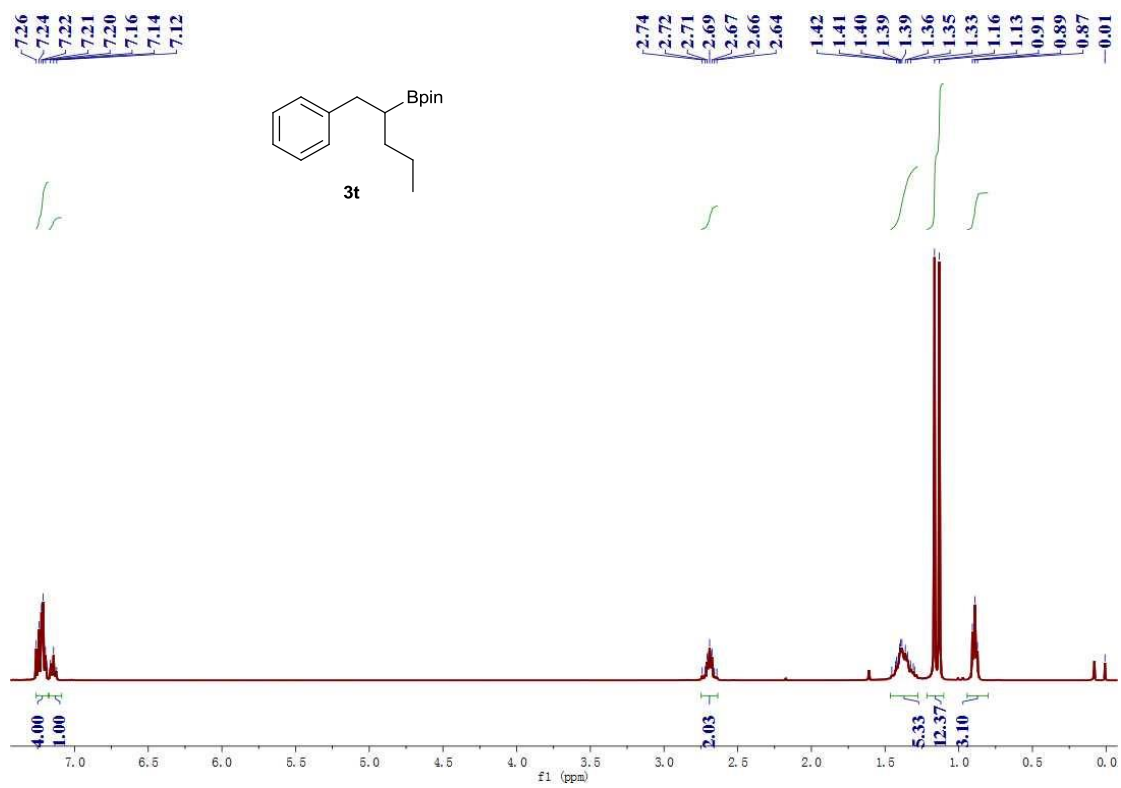

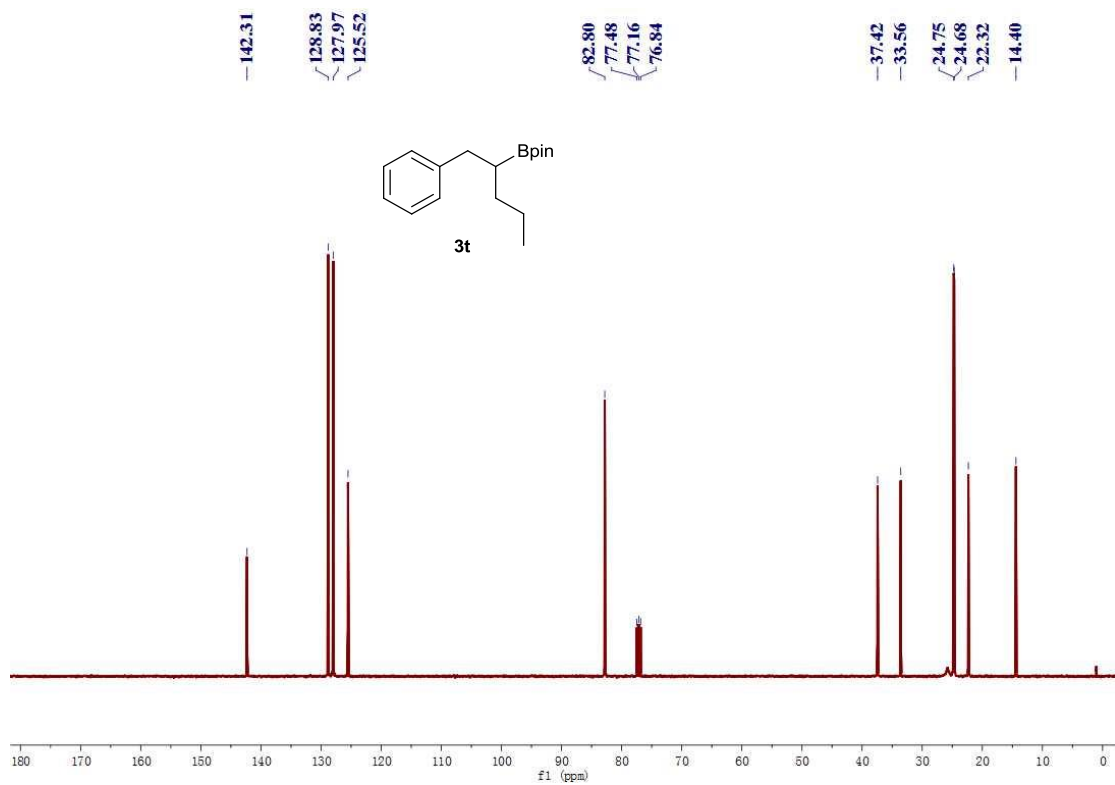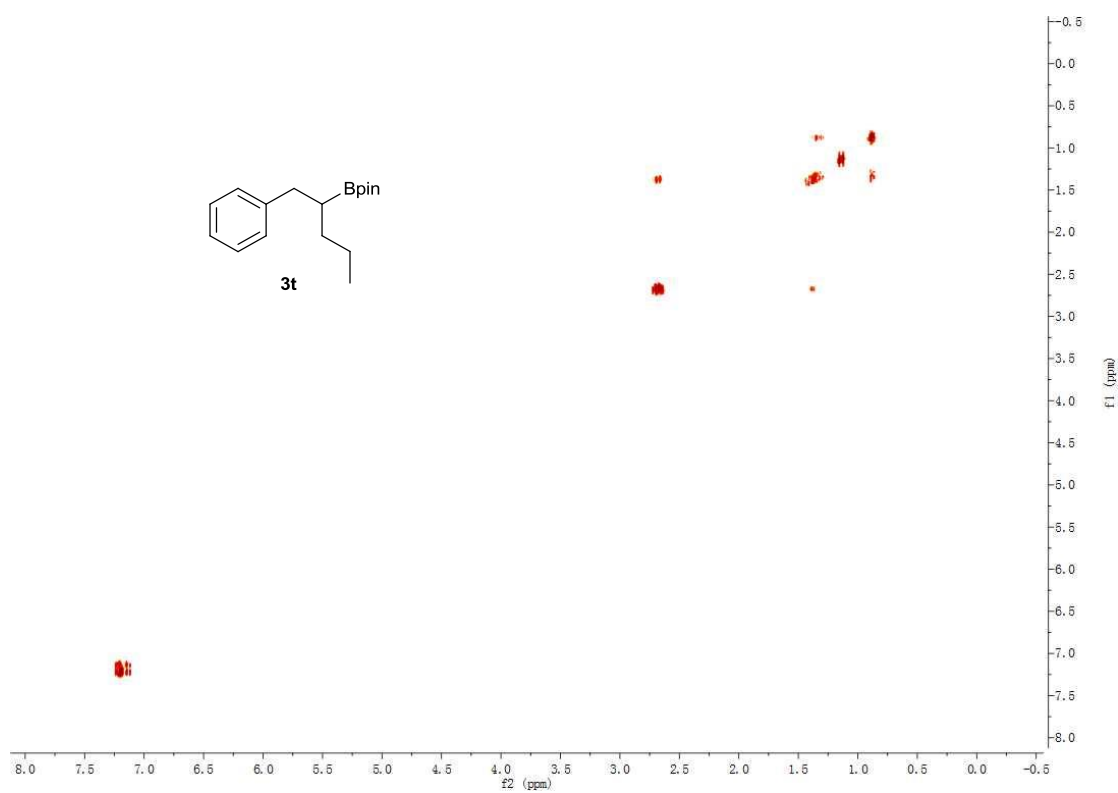

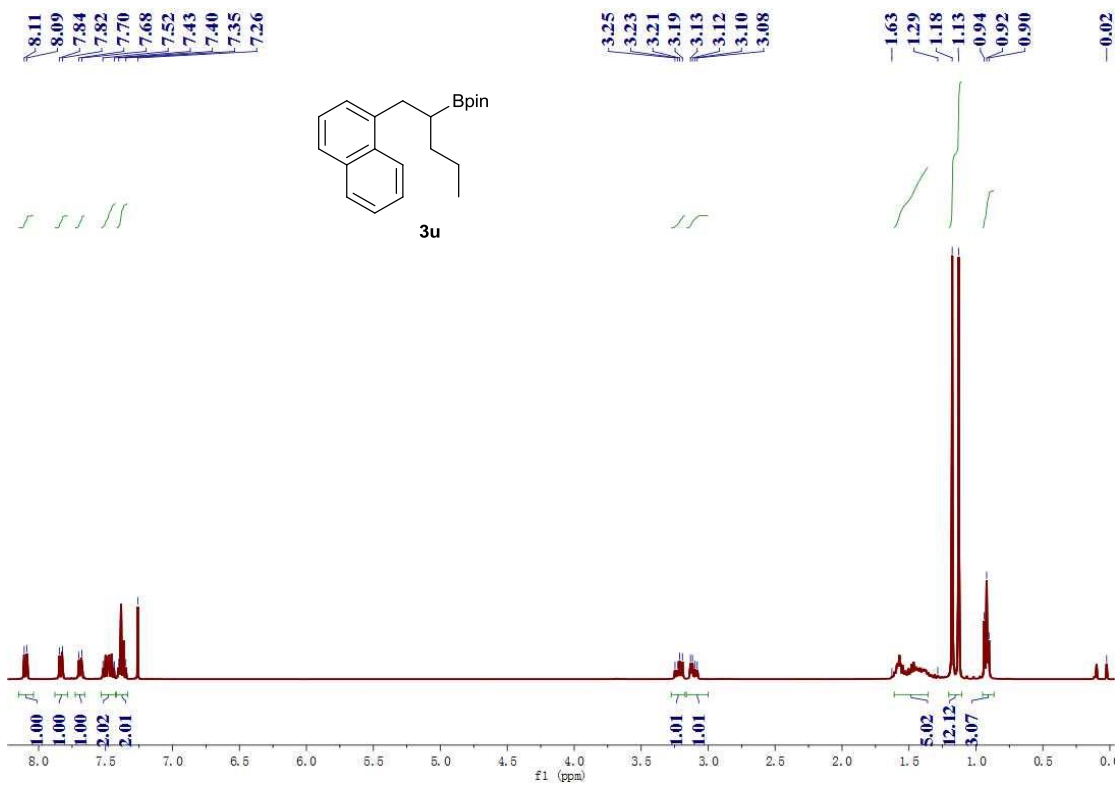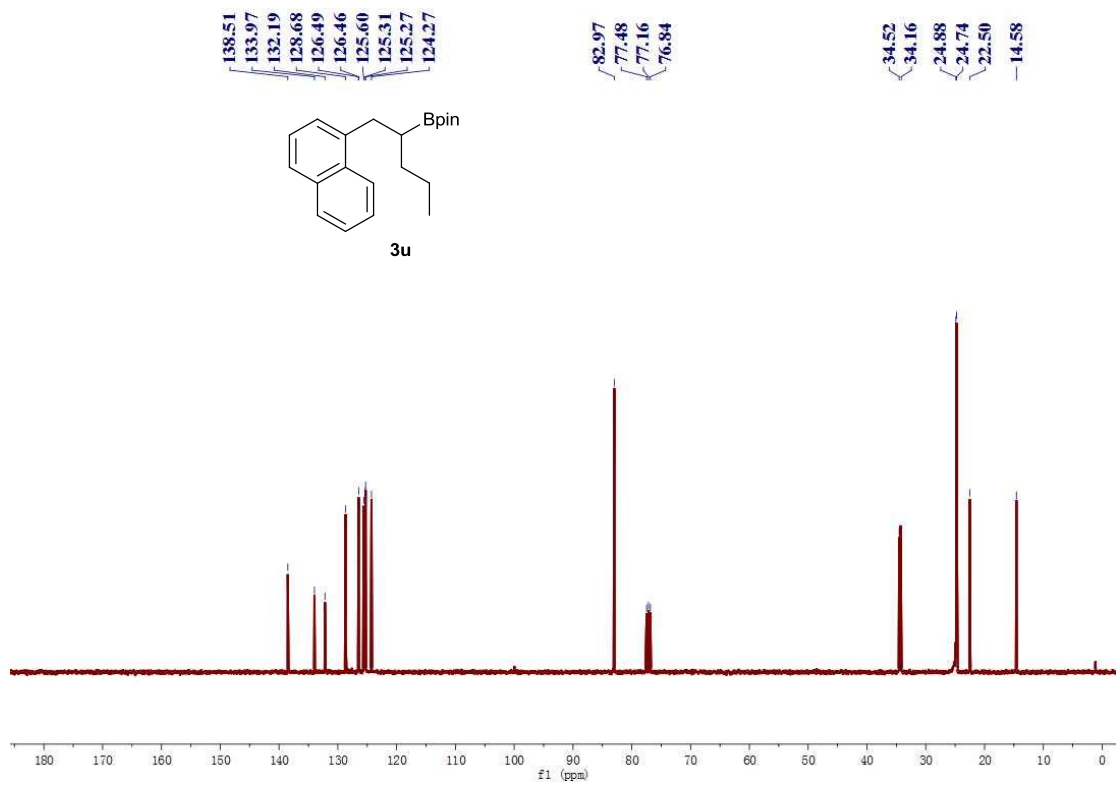

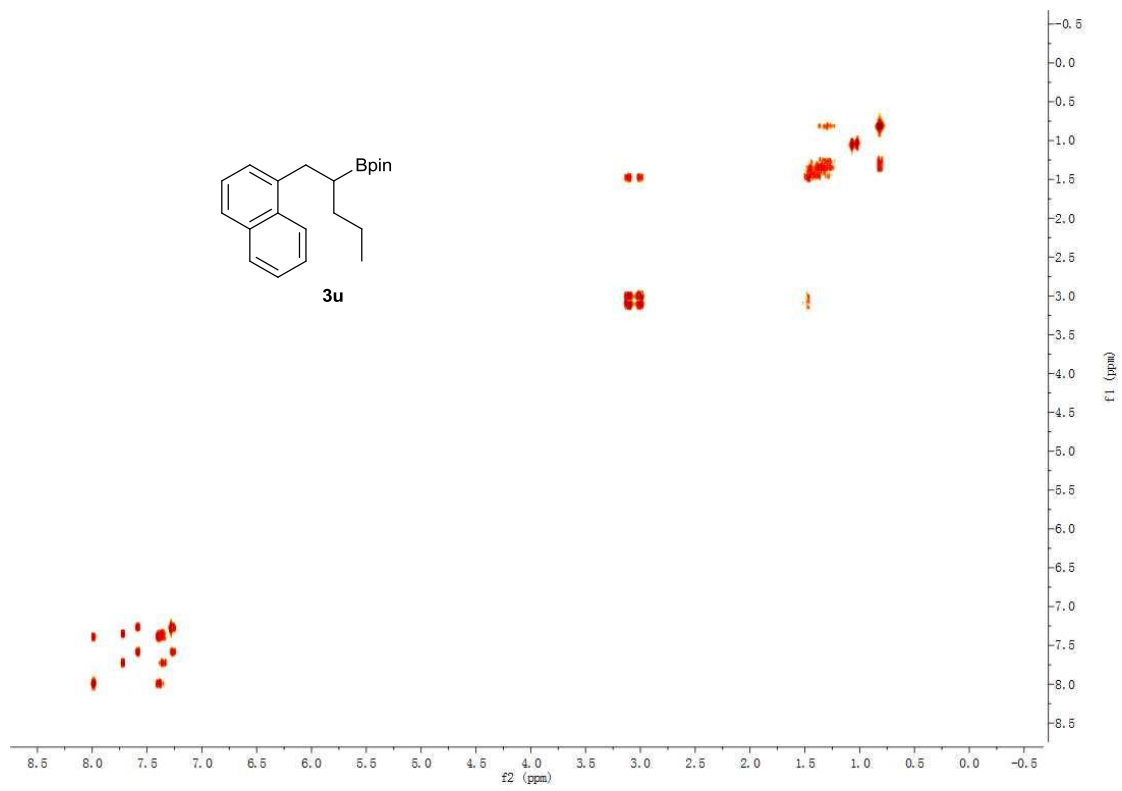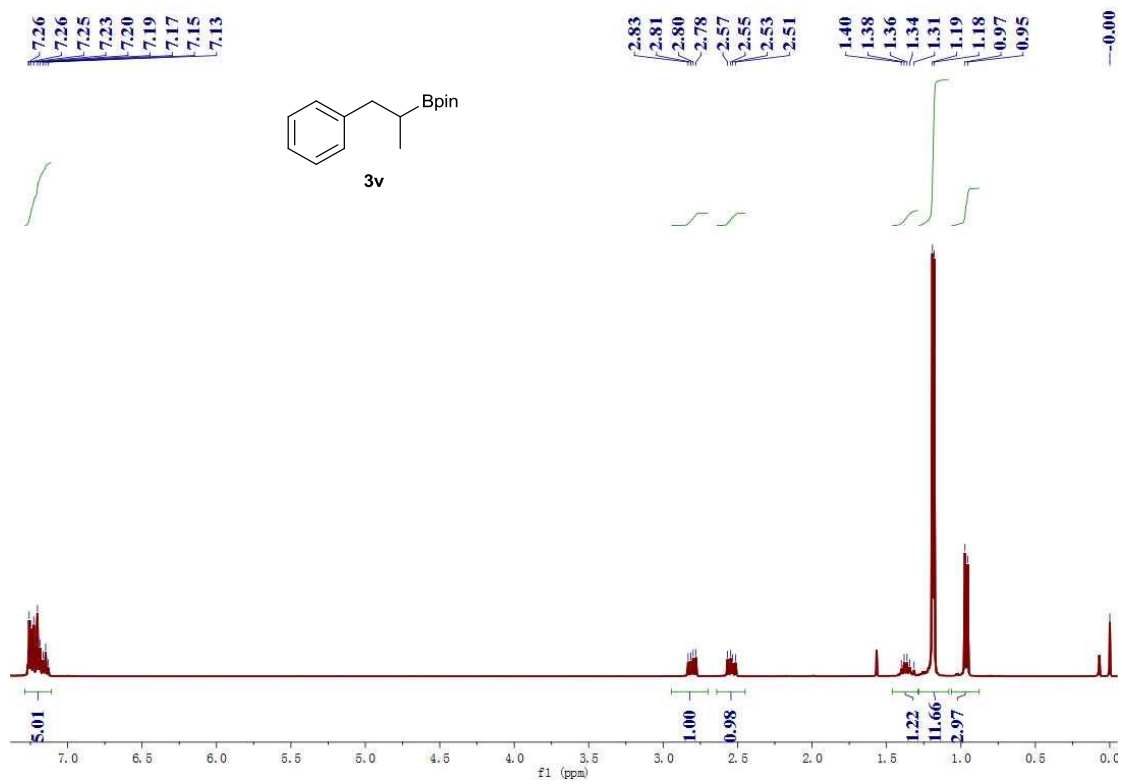



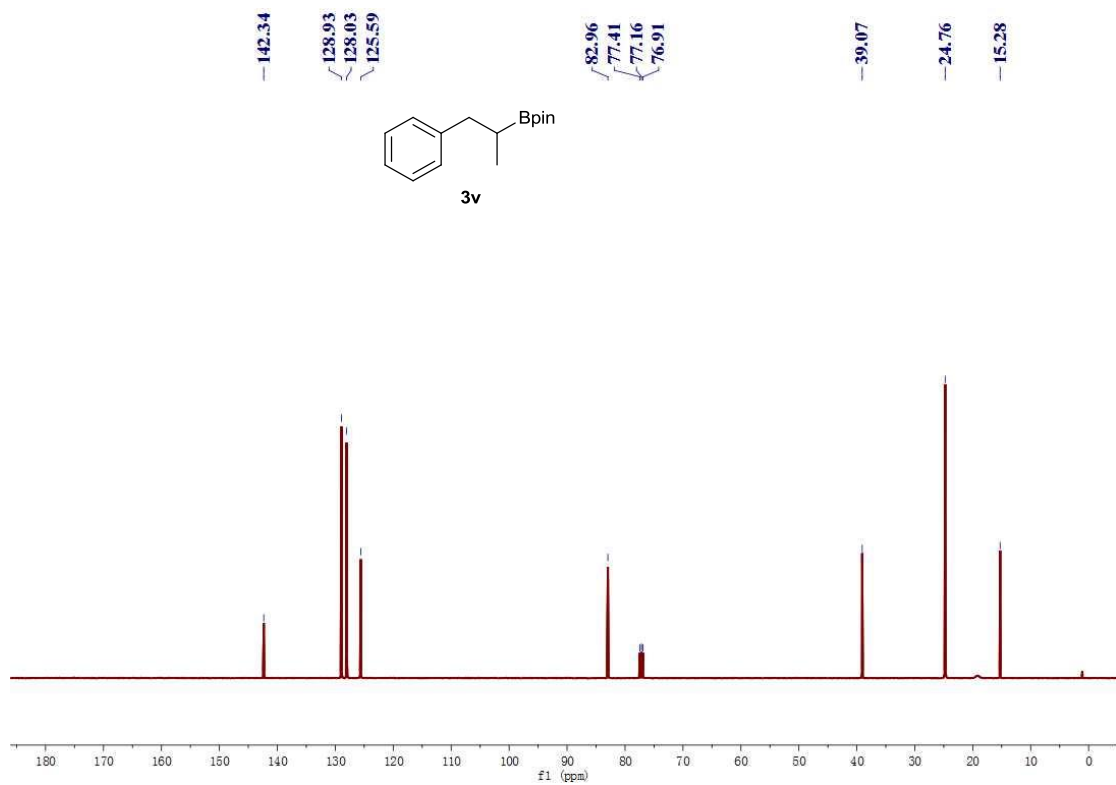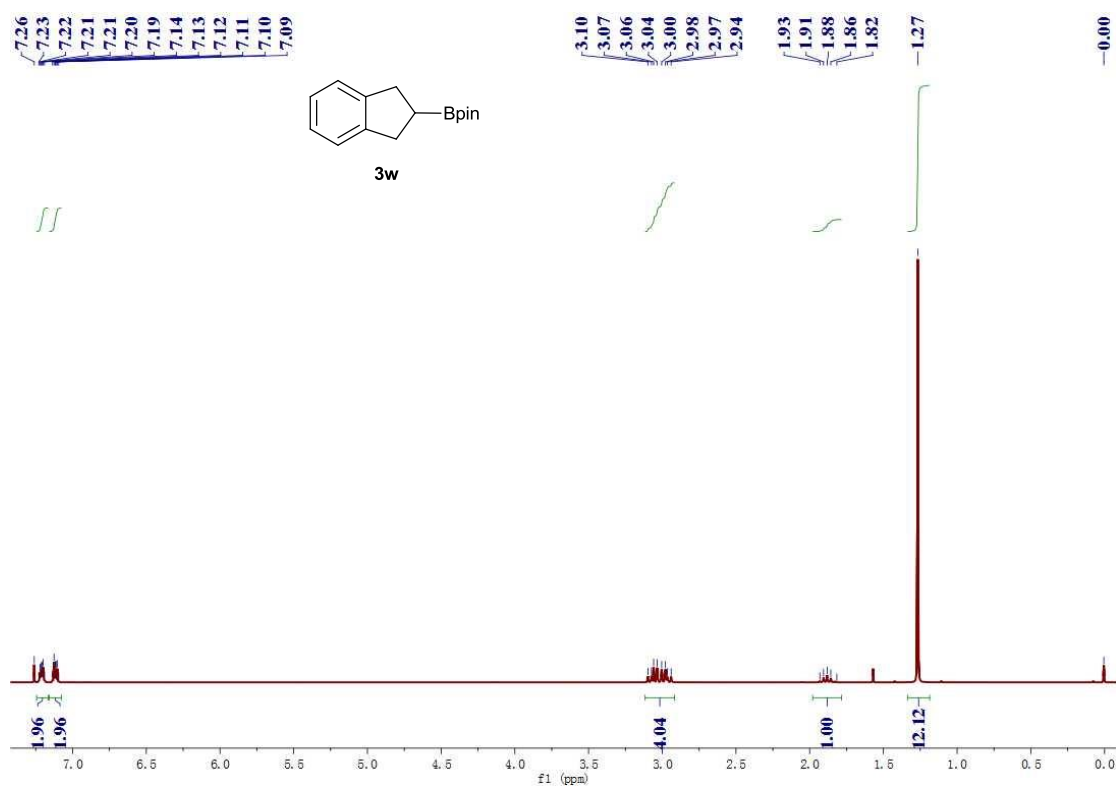

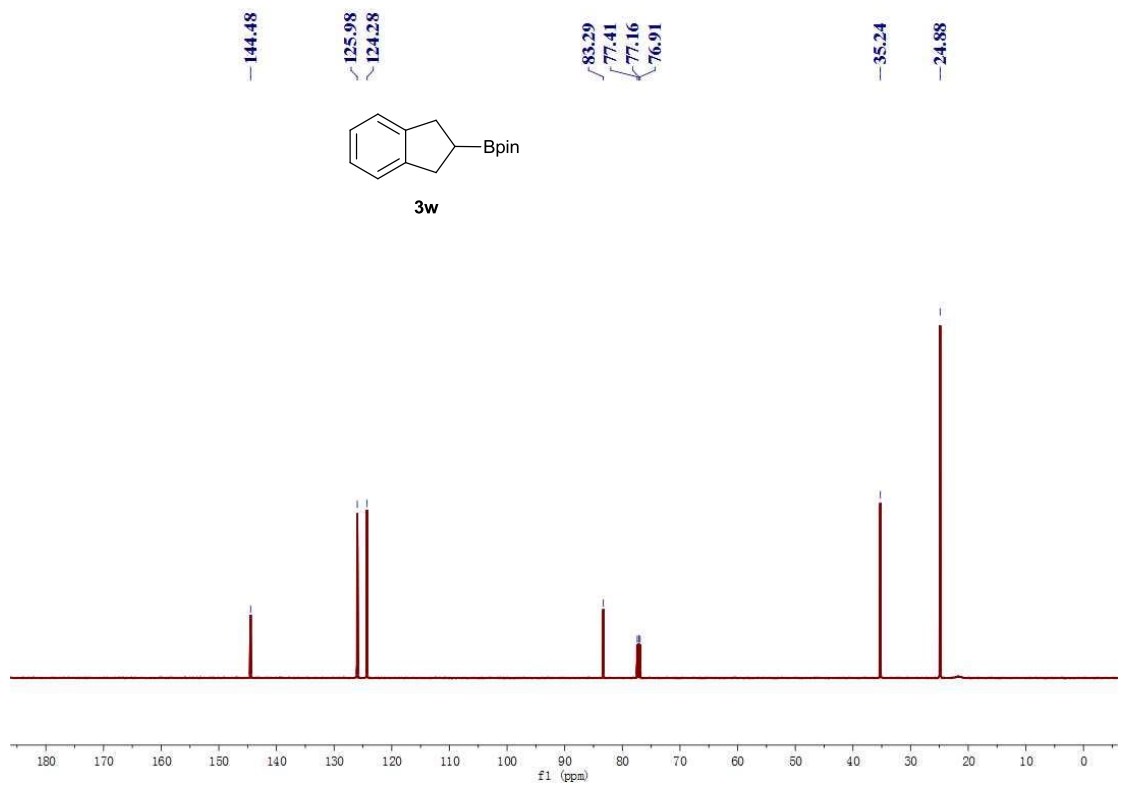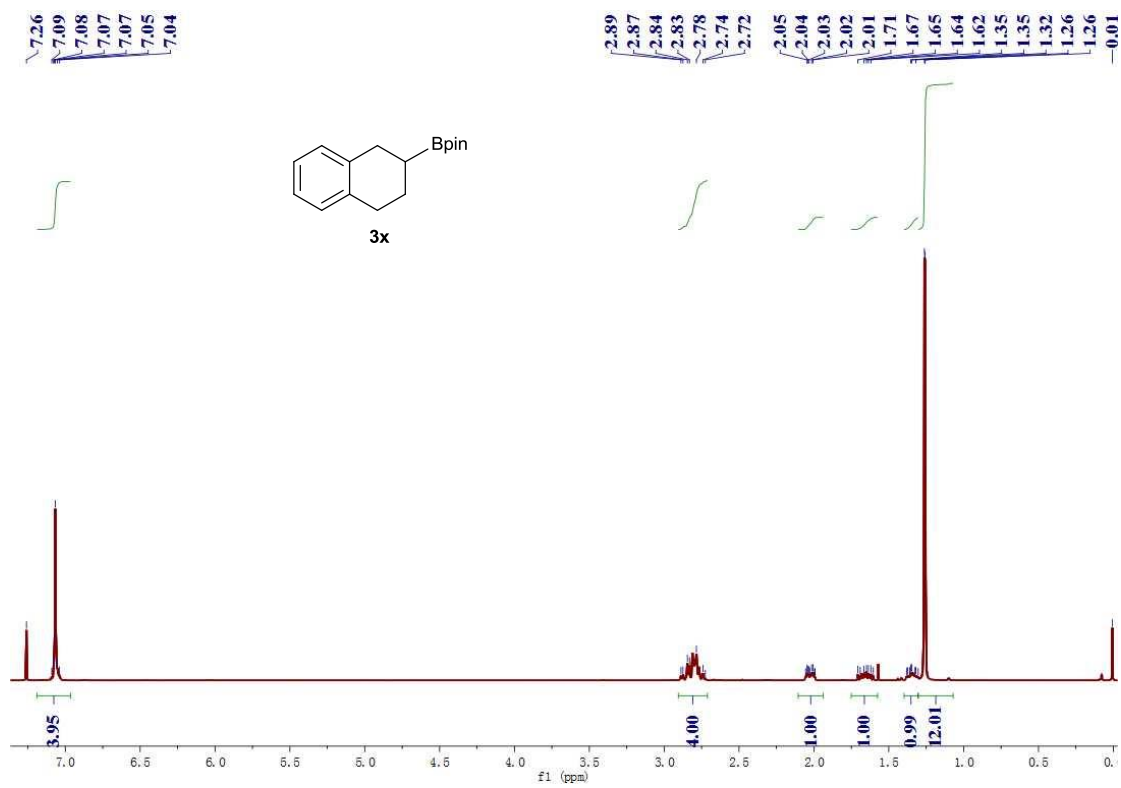

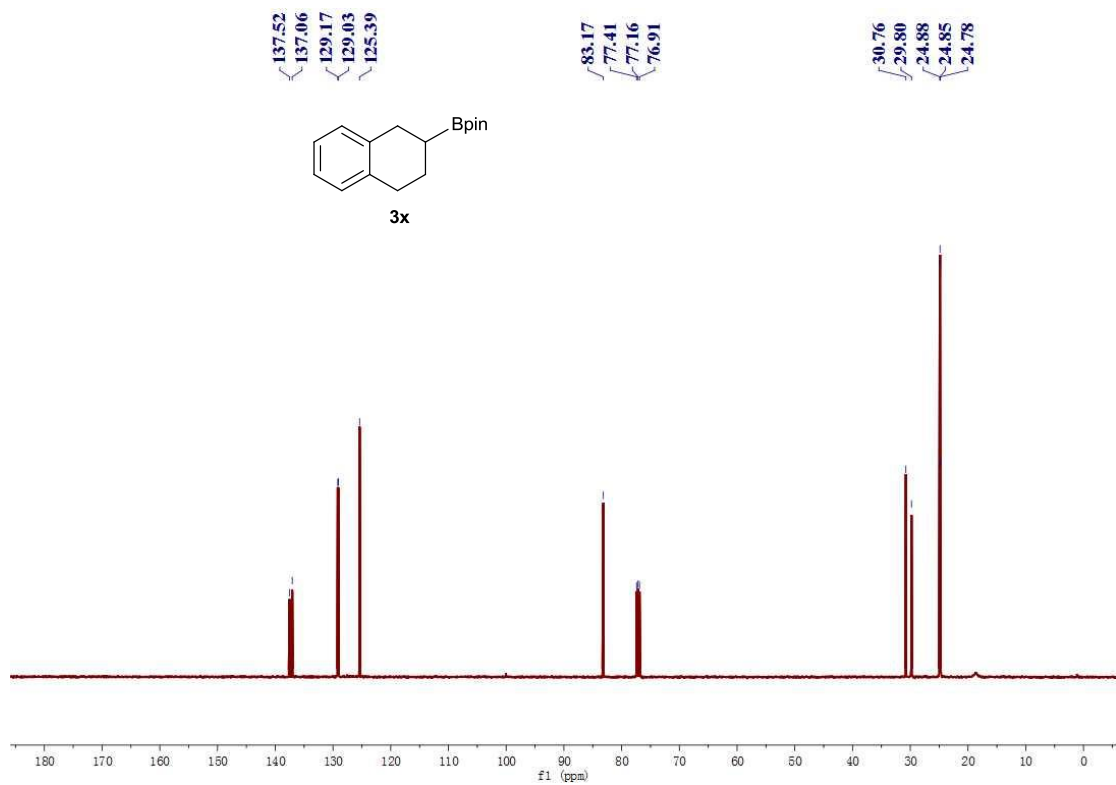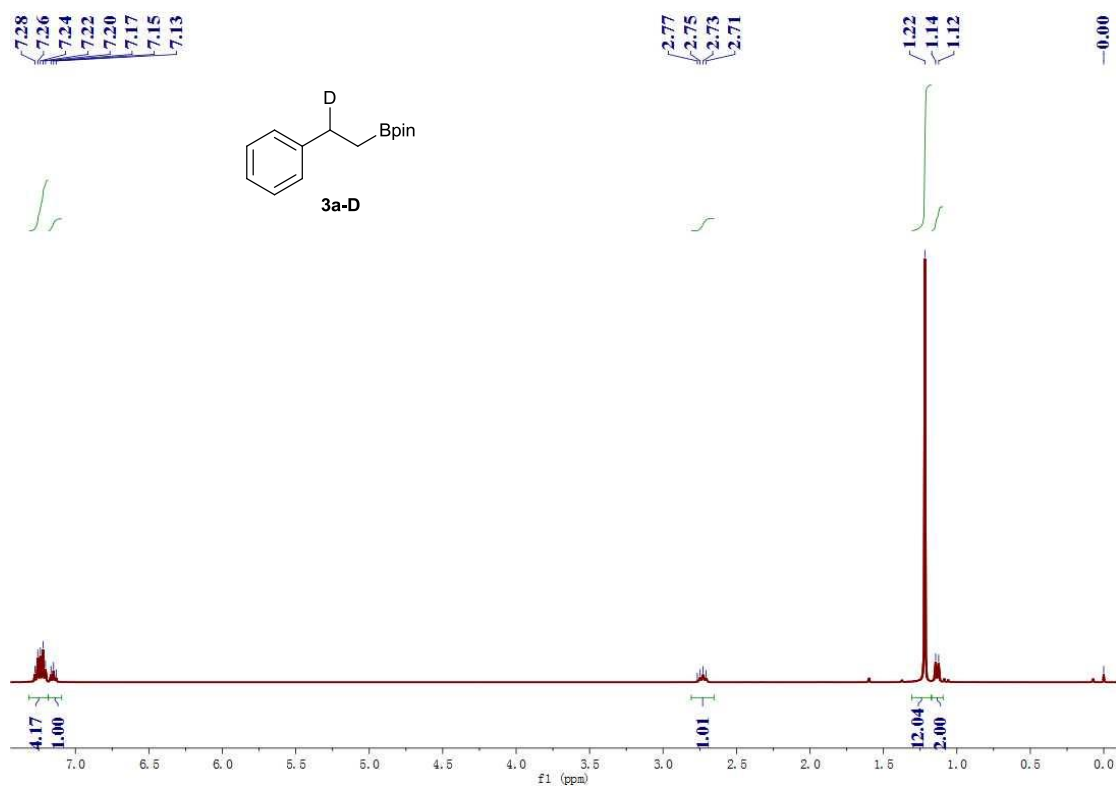

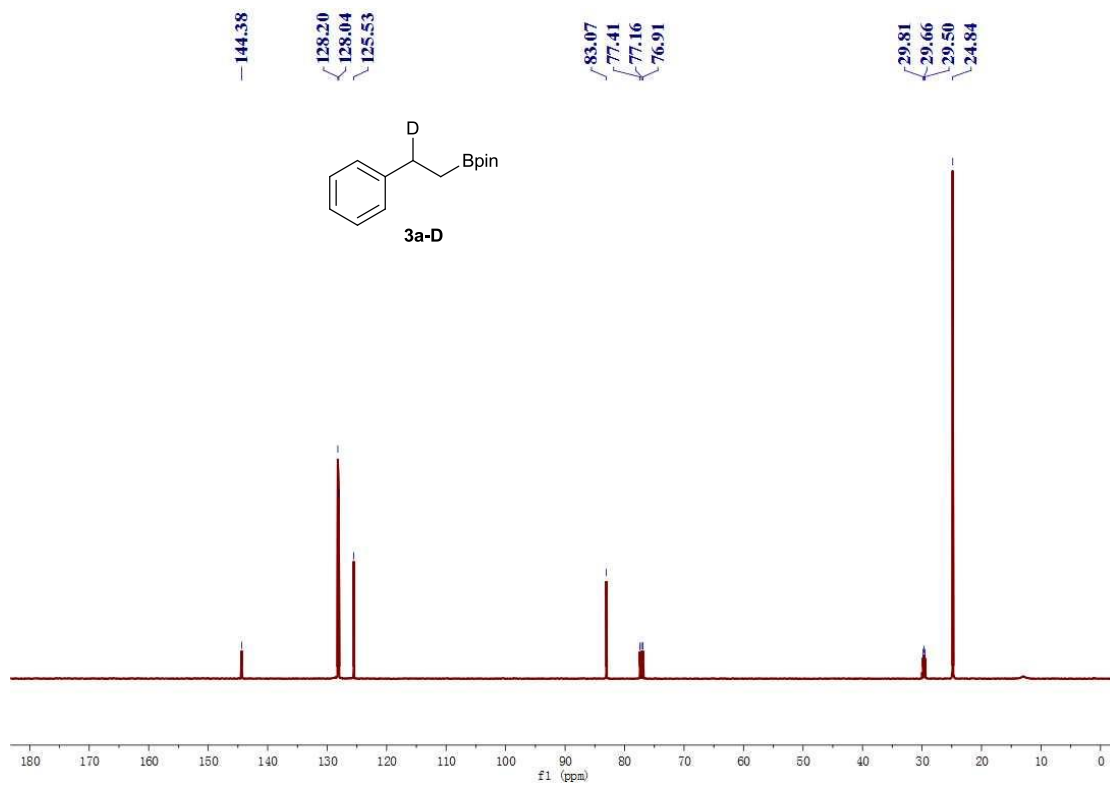

Supplement: c5ra14869c1.pdf [file c5ra14869c1.pdf]
